# Supplementary material for: Comparative Study on the Effect of Phenolics and Their Antioxidant Potential of Freeze-Dried Australian Beach-Cast Seaweed Species upon Different Extraction Methodologies
Source: MDPI journal article supplement (doi:10.3390/ph16050773), 2023-05-22
Supplement: s1 [file s1]

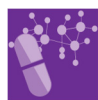

## Article

# Comparative Study on the Effect of Phenolics and Their Antioxidant Potential of Freeze-Dried Australian Beach-Cast Seaweed Species upon Different Extraction Methodologies

Vigasini Subbiah <sup>1,2</sup>, Faezeh Ebrahimi <sup>2</sup>, Osman T. Agar <sup>2</sup>, Frank R. Dunshea <sup>2,3</sup>, Colin J. Barrow <sup>1</sup> and Hafiz A. R. Suleria <sup>1,2,\*</sup>

<sup>1</sup> Centre for Sustainable Bioproducts, Deakin University, Waurn Ponds, VIC 3217, Australia; vsubbiah@deakin.edu.au (V.S.); colin.barrow@deakin.edu.au (C.J.B.)

<sup>2</sup> School of Agriculture, Food and Ecosystem Sciences, Faculty of Science, The University of Melbourne, Parkville, VIC 3010, Australia; ebrahimif@student.unimelb.edu.au (F.E.); osman.agar@unimelb.edu.au (O.T.A.); fdunshea@unimelb.edu.au (F.R.D.)

<sup>3</sup> Faculty of Biological Sciences, The University of Leeds, Leeds LS2 9JKT, UK

\* Correspondence: hafiz.suleria@unimelb.edu.au; Tel.: +61-470-439-670

**Abstract:** Brown seaweeds are rich in phenolic compounds and have high health benefits. However, the phenolics present in Australian beach-cast seaweed are still unclear. This study investigated the effect of ultrasonication and conventional methodologies by four different solvents on free and bound phenolics of freeze-dried brown seaweed species obtained from the southeast Australian shoreline. The phenolic content and their antioxidant potential were determined by *in vitro* assays followed by identification and characterization by LC-ESI-QTOF-MS/MS and quantified by HPLC-PDA. The *Cystophora* sp., displayed high total phenolic content (TPC) and phlorotannin content (FDA) when extracted using 70% ethanol (ultrasonication method). *Cystophora* sp., also exhibited strong antioxidant potential in various assays, such as DPPH, ABTS, and FRAP in 70% acetone through ultrasonication. TAC is highly correlated to FRAP, ABTS, and RPA ( $p < 0.05$ ) in both extraction methodologies. LC-ESI-QTOF-MS/MS analysis identified 94 and 104 compounds in ultrasound and conventional methodologies, respectively. The HPLC-PDA quantification observed phenolic acids to be higher in ultrasonication methodology. Our findings would facilitate the development of nutraceuticals, pharmaceuticals, and functional foods.

**Keywords:** seaweeds; freeze-drying; conventional extraction; ultrasonication; phenolic compounds; antioxidant activity; LC-ESI-QTOF-MS/MS, HPLC-PDA

**Citation:** Subbiah, V.; Ebrahimi, F.; Agar, O.T.; Dunshea, F.R.; Barrow, C.J.; Suleria, H.A.R. Comparative Study on the Effect of Phenolics and Their Antioxidant Potential of Freeze-Dried Australian Beach-Cast Seaweed Species upon Different Extraction Methodologies.

*Pharmaceuticals* **2023**, *16*, 773.

<https://doi.org/10.3390/ph16050773>

Academic Editors: Noelia Duarte and Isabel Ribeiro

Received: 27 April 2023

Revised: 17 May 2023

Accepted: 18 May 2023

Published: 22 May 2023

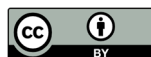

**Copyright:** © 2023 by the authors. Submitted for possible open access publication under the terms and conditions of the Creative Commons Attribution (CC BY) license (<https://creativecommons.org/licenses/by/4.0/>).

**Table S1:** Estimation of freeze-dried free phenolics of seaweed species extracted by the conventional and non-conventional method.

| Samples                           | Solvents | TPC<br>(mg GAE/g)           | TFC<br>(mg QE/g)           | TCT<br>(mg CE/g)          | DMBA<br>(PGE mg/g)       | PBA (PGE mg/g)           | FDA<br>(PGE mg/g)        |
|-----------------------------------|----------|-----------------------------|----------------------------|---------------------------|--------------------------|--------------------------|--------------------------|
| <b>Ultrasonication Extraction</b> |          |                             |                            |                           |                          |                          |                          |
| <i>Cystophora</i> sp.             | 70% ACE  | 17.63 ± 0.09 <sup>Aa</sup>  | 1.60 ± 0.01 <sup>Aa</sup>  | -                         | 1.75±0.08 <sup>Ea</sup>  | 1.78±0.30 <sup>Fe</sup>  | 9.37±0.72 <sup>Aa</sup>  |
|                                   | 70% MeOH | 15.60 ± 0.02 <sup>Ba</sup>  | 0.40 ± 0.01 <sup>Da</sup>  | -                         | 0.84±0.04 <sup>Ga</sup>  | 2.85±0.06 <sup>Ee</sup>  | 1.79±0.04 <sup>Ie</sup>  |
|                                   | 70% EtOH | 14.91 ± 1.32 <sup>Ba</sup>  | 1.20 ± 0.01 <sup>Ca</sup>  | 2.21 ± 0.07 <sup>Ba</sup> | 1.17±0.02 <sup>Fa</sup>  | 3.36±0.48 <sup>Dd</sup>  | 7.74±0.14 <sup>Ca</sup>  |
|                                   | EA       | -                           | 0.15 ± 0.01 <sup>Hb</sup>  | -                         | 4.04±0.01 <sup>Bb</sup>  | 4.95±0.25 <sup>CDa</sup> | -                        |
| <i>Phyllospora comosa</i>         | 70% ACE  | 14.60 ± 0.85 <sup>BCb</sup> | 1.02 ± 0.01 <sup>Kb</sup>  | -                         | 0.39±0.2 <sup>Ijd</sup>  | 5.28±0.29 <sup>Cc</sup>  | 8.24±0.90 <sup>Bb</sup>  |
|                                   | 70% MeOH | 13.39 ± 0.11 <sup>Cb</sup>  | 0.15 ± 0.01 <sup>Hd</sup>  | 0.70 ± 0.03 <sup>Db</sup> | 0.47±0.01 <sup>Ib</sup>  | 11.55±0.26 <sup>Aa</sup> | 6.19±0.17 <sup>DEa</sup> |
|                                   | 70% EtOH | 11.28 ± 0.02 <sup>Db</sup>  | 0.57 ± 0.01 <sup>Cb</sup>  | -                         | 0.42±0.01 <sup>Ib</sup>  | 3.13±0.22 <sup>De</sup>  | 6.36±0.42 <sup>Db</sup>  |
|                                   | EA       | 0.38 ± 0.01 <sup>Ib</sup>   | 0.09 ± 0.01 <sup>Ic</sup>  | -                         | 4.82±0.67 <sup>Aa</sup>  | -                        | -                        |
| <i>Sargassum</i> sp.              | 70% ACE  | 13.45 ± 0.72 <sup>Cb</sup>  | 0.31 ± 0.01 <sup>Fc</sup>  | -                         | 0.64±0.05 <sup>Hc</sup>  | 5.97±0.06 <sup>BCa</sup> | 1.83±0.02 <sup>He</sup>  |
|                                   | 70% MeOH | 8.96 ± 0.33 <sup>Ec</sup>   | 0.36 ± 0.01 <sup>Eb</sup>  | -                         | 0.46±0.05 <sup>Ib</sup>  | 3.41±0.07 <sup>Dc</sup>  | 2.71±0.10 <sup>GHc</sup> |
|                                   | 70% EtOH | 9.56 ± 0.56 <sup>Eb</sup>   | 0.41 ± 0.01 <sup>Dc</sup>  | 0.10 ± 0.03 <sup>Ec</sup> | 0.42±0.11 <sup>Ib</sup>  | 5.66±0.17 <sup>BCc</sup> | 0.28±0.01 <sup>Jd</sup>  |
|                                   | EA       | 0.34 ± 0.03 <sup>Ib</sup>   | 0.05 ± 0.01 <sup>Kd</sup>  | -                         | -                        | -                        | -                        |
| <i>Ecklonia radiata</i>           | 70% ACE  | 8.48 ± 0.17 <sup>EFc</sup>  | 0.23 ± 0.01 <sup>Gd</sup>  | -                         | 0.87±0.1 <sup>Gb</sup>   | 5.41±0.25 <sup>Cb</sup>  | 5.03±0.24 <sup>EFd</sup> |
|                                   | 70% MeOH | 8.65 ± 0.41 <sup>Ec</sup>   | 0.23 ± 0.01 <sup>Gc</sup>  | -                         | 0.84±0.07 <sup>Ga</sup>  | 5.94±0.37 <sup>BCb</sup> | 2.35±0.25 <sup>Hd</sup>  |
|                                   | 70% EtOH | 7.16 ± 0.10 <sup>Fc</sup>   | 0.24 ± 0.01 <sup>Gd</sup>  | -                         | 1.14±0.02 <sup>Fa</sup>  | 6.05±0.14 <sup>BCb</sup> | 3.01±0.30 <sup>Gc</sup>  |
|                                   | EA       | 0.11 ± 0.01 <sup>Ic</sup>   | 0.28 ± 0.01 <sup>Ga</sup>  | -                         | 3.79±0.31 <sup>Cc</sup>  | -                        | -                        |
| <i>Durvillaea</i> sp.             | 70% ACE  | 8.23 ± 0.67 <sup>EFc</sup>  | 0.04 ± 0.01 <sup>Ke</sup>  | -                         | 0.49±0.02 <sup>Id</sup>  | 5.16±0.14 <sup>Cd</sup>  | 5.45±0.24 <sup>Ec</sup>  |
|                                   | 70% MeOH | 4.13 ± 0.09 <sup>Hd</sup>   | 0.05 ± 0.01 <sup>Ke</sup>  | 2.73 ± 0.07 <sup>Aa</sup> | 0.32±0.02 <sup>Ijc</sup> | 3.24±0.48 <sup>Dd</sup>  | 4.36±0.29 <sup>Fb</sup>  |
|                                   | 70% EtOH | 5.65 ± 0.44 <sup>Gc</sup>   | 0.12 ± 0.01 <sup>Ie</sup>  | 1.78 ± 0.04 <sup>Cb</sup> | 0.39±0.01 <sup>Ijb</sup> | 6.63±0.58 <sup>Ba</sup>  | 3.01±0.25 <sup>Gc</sup>  |
|                                   | EA       | 4.89 ± 0.02 <sup>GHa</sup>  | 0.03 ± 0.01 <sup>Kd</sup>  | -                         | 3.29±0.12 <sup>Dd</sup>  | -                        | -                        |
| <b>Conventional Extraction</b>    |          |                             |                            |                           |                          |                          |                          |
| <i>Cystophora</i> sp.             | 70% ACE  | 14.77 ± 1.06 <sup>Aa</sup>  | 1.69 ± 0.01 <sup>Aa</sup>  | -                         | 0.48±0.04 <sup>EFa</sup> | 0.09±0.21 <sup>Ie</sup>  | 6.53±0.55 <sup>Cb</sup>  |
|                                   | 70% MeOH | 13.98 ± 0.58 <sup>Aa</sup>  | 0.55 ± 0.01 <sup>Da</sup>  | 2.33 ± 0.07 <sup>Ba</sup> | 0.81±0.26 <sup>DEb</sup> | 4.44±0.10 <sup>Dc</sup>  | 7.27±0.43 <sup>BCa</sup> |
|                                   | 70% EtOH | 13.74 ± 0.58 <sup>Aa</sup>  | 1.47 ± 0.01 <sup>Ba</sup>  | 1.20 ± 0.07 <sup>Ca</sup> | 0.67±0.14 <sup>Eb</sup>  | 5.66±0.25 <sup>Cb</sup>  | 8.10±0.55 <sup>Ba</sup>  |
|                                   | EA       | -                           | 0.04 ± 0.01 <sup>JKc</sup> | -                         | -                        | -                        | -                        |
| <i>Sargassum</i> sp.              | 70% ACE  | 10.24 ± 0.41 <sup>Cc</sup>  | 0.20 ± 0.01 <sup>Gd</sup>  | -                         | 0.50±0.01 <sup>EFa</sup> | 3.96±0.13 <sup>Ea</sup>  | 2.13±0.10 <sup>Fd</sup>  |
|                                   | 70% MeOH | 8.82 ± 0.63 <sup>Dc</sup>   | 0.45 ± 0.01 <sup>Eb</sup>  | -                         | 0.48±0.03 <sup>EFc</sup> | 6.06±0.15 <sup>Ba</sup>  | 2.38±0.1 <sup>EFb</sup>  |
|                                   | 70% EtOH | 6.49 ± 0.15 <sup>Fc</sup>   | 0.07 ± 0.01 <sup>Ijd</sup> | -                         | 0.47±0.01 <sup>EFc</sup> | 3.00±0.70 <sup>F</sup>   | -                        |
|                                   | EA       | -                           | -                          | -                         | 4.91±0.75 <sup>Bb</sup>  | 0.24±0.06 <sup>Ij</sup>  | -                        |
| <i>Phyllospora comosa</i>         | 70% ACE  | 13.04 ± 0.50 <sup>Bb</sup>  | 0.75 ± 0.01 <sup>Cb</sup>  | -                         | 0.33±0.01 <sup>Fb</sup>  | 2.28±0.35 <sup>GHd</sup> | 1.42±0.12 <sup>Ge</sup>  |
|                                   | 70% MeOH | 10.42 ± 0.81 <sup>Cb</sup>  | 0.09 ± 0.01 <sup>HId</sup> | -                         | 0.27±0.01 <sup>FGc</sup> | 1.27±0.22 <sup>Hde</sup> | 1.57±0.01 <sup>Gd</sup>  |
|                                   | 70% EtOH | 9.43± 0.59 <sup>Cb</sup>    | 0.33 ± 0.01 <sup>Fc</sup>  | -                         | 0.40±0.01 <sup>EFc</sup> | 6.69±0.10 <sup>Aa</sup>  | 4.15±0.21 <sup>Db</sup>  |

|                         |          |                            |                            |                            |                          |                          |                          |
|-------------------------|----------|----------------------------|----------------------------|----------------------------|--------------------------|--------------------------|--------------------------|
| <i>Ecklonia radiata</i> | EA       | -                          | 0.07 ± 0.01 <sup>IJb</sup> | -                          | 4.24±0.04 <sup>Cc</sup>  | 2.39±0.20 <sup>GH</sup>  | -                        |
|                         | 70% ACE  | 7.86 ± 0.30 <sup>Ed</sup>  | 0.10 ± 0.01 <sup>He</sup>  | -                          | 0.48±0.04 <sup>EFa</sup> | 2.54±0.05 <sup>Gc</sup>  | 3.12±0.29 <sup>Ec</sup>  |
|                         | 70% MeOH | 7.16 ± 0.37 <sup>Fd</sup>  | 0.09 ± 0.01 <sup>HIc</sup> | -                          | 1.01±0.12 <sup>Da</sup>  | 0.54±0.11 <sup>Ie</sup>  | 2.01±0.19 <sup>Fc</sup>  |
|                         | 70% EtOH | 5.60 ± 0.20 <sup>Gcd</sup> | 0.23 ± 0.01 <sup>Gcc</sup> | -                          | 0.78±0.08 <sup>DEa</sup> | 4.65±0.08 <sup>Dd</sup>  | 1.35±0.01 <sup>Gd</sup>  |
| <i>Durvillaea</i> sp.   | EA       | -                          | 0.09 ± 0.01 <sup>HIa</sup> | 27.75 ± 0.23 <sup>Aa</sup> | 5.08±0.31 <sup>Aa</sup>  | 0.10±0.34 <sup>I</sup>   | -                        |
|                         | 70% ACE  | 7.37 ± 0.20 <sup>Fd</sup>  | 0.32 ± 0.03 <sup>Fc</sup>  | -                          | 0.29±0.08 <sup>FGb</sup> | 2.72±0.10 <sup>FGb</sup> | 19.64±0.24 <sup>Aa</sup> |
|                         | 70% MeOH | 3.83 ± 0.15 <sup>Ie</sup>  | 0.01 ± 0.01 <sup>Ld</sup>  | 1.17 ± 0.09 <sup>Cb</sup>  | 0.29±0.08 <sup>FGc</sup> | 5.84±0.02 <sup>BCb</sup> | 0.02±0.01 <sup>He</sup>  |
|                         | 70% EtOH | 4.98 ± 0.33 <sup>Hd</sup>  | 0.04 ± 0.01 <sup>IKe</sup> | 0.37 ± 0.07 <sup>Db</sup>  | 0.39±0.05 <sup>Fc</sup>  | 4.76±0.08 <sup>Dc</sup>  | 2.71±0.27 <sup>DEc</sup> |
|                         | EA       | -                          | 0.02 ± 0.01 <sup>KLd</sup> | -                          | 0.49±0.01 <sup>EFd</sup> | -                        | -                        |

All values are expressed as the mean ± SD and performed in triplicates. Different letters (a, b, c, d, e) within the same column are significantly different ( $p < 0.05$ ) samples within the solvent whereas letters (A, B, C, D, E) within the same column are significantly different ( $p < 0.05$ ) samples within the species. Six species of seaweed are reported based on dry weight. CE (catechin equivalents), QE (quercetin equivalents), GAE (gallic acid equivalents), PGE (phloroglucinol equivalents). TFC (total flavonoids content), TPC (total phenolic content), TCT (total tannins content), DMBA (2,4-dimethoxybenzaldehyde assay), PBA (Prussian blue assay), FDA (Folin-Denis Assay). The abbreviation of solvents expressed are ACE (Acetone), MeOH (Methanol), EtOH (Ethanol), EA (Ethyl Acetate).

**Table S2:** Estimation of freeze-dried bound phenolics of seaweed species extracted by the conventional and non-conventional method.

| Samples                           | Solvents | TPC<br>(mg GAE/g)            | TFC<br>(mg QE/g)              | TCT<br>(mg CE/g)           | DMBA (PGE mg/g)          | PBA<br>(PGE mg/g)        | FDA<br>(PGE mg/g)        |
|-----------------------------------|----------|------------------------------|-------------------------------|----------------------------|--------------------------|--------------------------|--------------------------|
| <b>Ultrasonication Extraction</b> |          |                              |                               |                            |                          |                          |                          |
| <i>Cystophora</i> sp.             | ACE      | 1.72 ± 0.04 <sup>GHb</sup>   | 0.68 ± 0.05 <sup>Hbc</sup>    | 0.67 ± 0.06 <sup>GHc</sup> | 0.21±0.01 <sup>Fc</sup>  | 0.83±0.06 <sup>EFb</sup> | 1.84±0.17 <sup>Cb</sup>  |
|                                   | MeOH     | 7.14 ± 0.67 <sup>Ca</sup>    | 2.94 ± 0.14 <sup>CDb</sup>    | -                          | 0.18±0.01 <sup>Fc</sup>  | 5.76±0.07 <sup>Aa</sup>  | 2.07±0.10 <sup>Ba</sup>  |
|                                   | EtOH     | 14.01 ± 0.68 <sup>Aa</sup>   | 2.63 ± 0.22 <sup>CDEb</sup>   | -                          | 0.46±0.01 <sup>Ea</sup>  | 4.75±0.39 <sup>Ba</sup>  | 6.46±0.61 <sup>Aa</sup>  |
|                                   | EA       | 1.66 ± 0.03 <sup>Jd</sup>    | 6.99 ± 0.1 <sup>EFGHc</sup>   | 0.94 ± 0.18 <sup>GHa</sup> | 0.11±0.01 <sup>FGe</sup> | 0.10±0.01 <sup>Hd</sup>  | -                        |
| <i>Phyllospora<br/>comosa</i>     | ACE      | 1.51 ± 0.05 <sup>Hb</sup>    | 0.85 ± 0.03 <sup>GHb</sup>    | 0.94 ± 0.07 <sup>DEb</sup> | 4.57±0.45 <sup>Ba</sup>  | 0.90±0.04 <sup>EFa</sup> | 0.33±0.03 <sup>GHe</sup> |
|                                   | MeOH     | 3.46 ± 0.12 <sup>DEb</sup>   | 3.29 ± 0.18 <sup>Cb</sup>     | 2.06 ± 0.17 <sup>Ba</sup>  | 0.20±0.01 <sup>Fb</sup>  | 1.07±0.01 <sup>Ed</sup>  | 0.39±0.02 <sup>Ge</sup>  |
|                                   | EtOH     | 1.13 ± 0.03 <sup>HIId</sup>  | 3.05 ± 0.11 <sup>Ca</sup>     | 2.18 ± 0.16 <sup>Aa</sup>  | 0.04±0.01 <sup>Gc</sup>  | 0.07±0.01 <sup>Hc</sup>  | -                        |
|                                   | EA       | 1.85 ± 0.13 <sup>GHb</sup>   | 3.46 ± 0.31 <sup>Cbc</sup>    | 0.77 ± 0.06 <sup>EFb</sup> | 1.83±0.09 <sup>Dd</sup>  | 0.13±0.01 <sup>GHD</sup> | -                        |
| <i>Sargassum</i> sp.              | ACE      | 1.15 ± 0.09 <sup>Hc</sup>    | 0.36 ± 0.03 <sup>Hd</sup>     | 0.27 ± 0.02 <sup>Id</sup>  | 0.25±0.02 <sup>Fb</sup>  | 0.53±0.04 <sup>FGc</sup> | 2.20±0.09 <sup>Ba</sup>  |
|                                   | MeOH     | 7.41 ± 0.17 <sup>BCa</sup>   | 1.03 ± 0.04 <sup>FGHc</sup>   | -                          | 0.22±0.01 <sup>Fa</sup>  | 4.36±0.14 <sup>BCb</sup> | 0.99±0.24 <sup>Pb</sup>  |
|                                   | EtOH     | 7.97 ± 0.53 <sup>Bb</sup>    | 2.38 ± 0.05 <sup>CDEb</sup>   | 0.53 ± 0.04 <sup>Ib</sup>  | 0.30±0.01 <sup>EFb</sup> | 1.19±0.10 <sup>Eb</sup>  | 0.38±0.05 <sup>Gd</sup>  |
|                                   | EA       | -                            | 2.55 ± 0.15 <sup>CDEbc</sup>  | -                          | 3.62±0.32 <sup>Cc</sup>  | 1.18±0.06 <sup>Ea</sup>  | -                        |
| <i>Ecklonia radiata</i>           | ACE      | 2.71 ± 0.08 <sup>EFa</sup>   | 0.61 ± 0.03 <sup>Hc</sup>     | 1.29 ± 0.01 <sup>Ca</sup>  | 0.15±0.01 <sup>FGd</sup> | 0.45±0.04 <sup>FGd</sup> | 0.70±0.03 <sup>Ed</sup>  |
|                                   | MeOH     | 3.54 ± 0.04 <sup>Db</sup>    | 10.92 ± 0.97 <sup>Ba</sup>    | 0.92 ± 0.09 <sup>DEb</sup> | 0.12±0.01 <sup>FGd</sup> | 2.06±0.02 <sup>Cc</sup>  | 0.85±0.04 <sup>DEc</sup> |
|                                   | EtOH     | 1.87 ± 0.16 <sup>GHd</sup>   | 1.42 ± 0.13 <sup>DEFGHc</sup> | -                          | 0.04±0.01 <sup>Gd</sup>  | 0.08±0.01 <sup>Hc</sup>  | 0.43±0.01 <sup>FGc</sup> |
|                                   | EA       | 1.43 ± 0.07 <sup>Hc</sup>    | 3.76 ± 0.05 <sup>Cb</sup>     | -                          | 4.50±0.36 <sup>Bb</sup>  | 0.92±0.03 <sup>EFb</sup> | -                        |
| <i>Durvillaea</i> sp.             | ACE      | 1.75 ± 0.15 <sup>GHb</sup>   | 3.31 ± 0.15 <sup>Ca</sup>     | 1.04 ± 0.07 <sup>Db</sup>  | 0.08±0.01 <sup>Ge</sup>  | 0.20±0.01 <sup>Ge</sup>  | 1.47±0.11 <sup>CDc</sup> |
|                                   | MeOH     | 0.32 ± 0.01 <sup>Ij</sup>    | 1.27 ± 0.1 <sup>EFGHc</sup>   | -                          | 0.03±0.01 <sup>GHe</sup> | 0.63±0.02 <sup>Fe</sup>  | 0.48±0.04 <sup>Fd</sup>  |
|                                   | EtOH     | 2.95 ± 0.19 <sup>DEFc</sup>  | 3.04 ± 0.04 <sup>Ca</sup>     | 0.13 ± 0.01 <sup>HIb</sup> | 0.01±0.01 <sup>GHD</sup> | -                        | 0.62±0.06 <sup>EFb</sup> |
|                                   | EA       | 2.37 ± 0.20 <sup>FGa</sup>   | 18.20 ± 0.56 <sup>Aa</sup>    | -                          | 4.93±0.14 <sup>Aa</sup>  | 0.48±0.02 <sup>FGc</sup> | -                        |
| <b>Conventional Extraction</b>    |          |                              |                               |                            |                          |                          |                          |
| <i>Cystophora</i> sp.             | ACE      | 3.5 ± 0.34 <sup>Cb</sup>     | 0.78 ± 0.20 <sup>Ga</sup>     | 0.15 ± 0.01 <sup>FGc</sup> | 0.1±0.01 <sup>DEb</sup>  | 0.39±0.02 <sup>CDb</sup> | 0.64±0.13 <sup>Dd</sup>  |
|                                   | MeOH     | 4.61 ± 0.95 <sup>Aa</sup>    | 1.28 ± 0.03 <sup>Ca</sup>     | 0.22 ± 0.04 <sup>EFc</sup> | 0.13±0.01 <sup>Da</sup>  | 2.91±0.22 <sup>Aa</sup>  | 1.67±0.29 <sup>Aa</sup>  |
|                                   | EtOH     | 1.75 ± 0.24 <sup>Db</sup>    | 1.01 ± 0.26 <sup>EFab</sup>   | 0.2 ± 0.05 <sup>Fcb</sup>  | 0.35±0.02 <sup>Ca</sup>  | 0.54±0.1 <sup>Cb</sup>   | 0.34±0.01 <sup>Ed</sup>  |
|                                   | EA       | 0.96 ± 0.10 <sup>EFa</sup>   | 2.47 ± 0.45 <sup>Bb</sup>     | 0.17 ± 0.02 <sup>FGa</sup> | -                        | -                        | -                        |
| <i>Sargassum</i> sp.              | ACE      | 3.7 ± 0.61 <sup>Ba</sup>     | 0.14 ± 0.03 <sup>JKc</sup>    | 0.28 ± 0.03 <sup>DEb</sup> | 0.15±0.01 <sup>Da</sup>  | 0.75±0.19 <sup>Ba</sup>  | 0.92±0.30 <sup>Cc</sup>  |
|                                   | MeOH     | 1.55 ± 0.12 <sup>Db</sup>    | 0.93 ± 0.07 <sup>EFc</sup>    | 0.43 ± 0.11 <sup>Cb</sup>  | 0.06±0.01 <sup>DEc</sup> | 0.98±0.09 <sup>ABb</sup> | 0.53±0.08 <sup>DEc</sup> |
|                                   | EtOH     | 2.4 ± 0.43 <sup>Ca</sup>     | 0.89 ± 0.18 <sup>FGbc</sup>   | 0.13 ± 0.01 <sup>Gd</sup>  | 0.11±0.02 <sup>Db</sup>  | 0.7±0.19 <sup>BCa</sup>  | 0.69±0.13 <sup>Db</sup>  |
|                                   | EA       | 0.52 ± 0.10 <sup>EFGHc</sup> | 6.35 ± 0.05 <sup>Aa</sup>     | -                          | 1.41±0.01 <sup>Bb</sup>  | -                        | -                        |
| <i>Ecklonia radiata</i>           | ACE      | 2.92 ± 0.35 <sup>Ec</sup>    | 0.25 ± 0.01 <sup>Ijb</sup>    | -                          | 0.05±0.01 <sup>DEc</sup> | -                        | 0.45±0.08 <sup>Ee</sup>  |
|                                   | MeOH     | 3.47 ± 0.81 <sup>EFGc</sup>  | 0.03 ± 0.01 <sup>CDb</sup>    | -                          | 0.06±0.01 <sup>DEc</sup> | 0.21±0.03 <sup>Dd</sup>  | 0.35±0.04 <sup>Fd</sup>  |
|                                   | EtOH     | 3.14±0.59 <sup>EFGHc</sup>   | 0.11 ± 0.01 <sup>DEa</sup>    | -                          | 0.03±0.01 <sup>DEd</sup> | 0.26±0.07 <sup>Dc</sup>  | 0.54±0.06 <sup>DEc</sup> |

|                           |      |                             |                              |                            |                          |                          |                          |
|---------------------------|------|-----------------------------|------------------------------|----------------------------|--------------------------|--------------------------|--------------------------|
|                           | EA   | -                           | 0.02 ± 0.01 <sup>Cc</sup>    | -                          | 1.71±0.01 <sup>Aa</sup>  | -                        | -                        |
| <i>Phyllospora comosa</i> | ACE  | 0.68 ± 0.11 <sup>EFHd</sup> | 0.32 ± 0.06 <sup>Ib</sup>    | 0.02 ± 0.01 <sup>Hd</sup>  | 0.11±0.03 <sup>Da</sup>  | 0.16±0.01 <sup>DEc</sup> | 1.44±0.10 <sup>Ba</sup>  |
|                           | MeOH | 0.6 ± 0.09 <sup>EFHcd</sup> | 0.13 ± 0.02 <sup>Kd</sup>    | 0.59 ± 0.13 <sup>Ba</sup>  | 0.11±0.01 <sup>Db</sup>  | 0.94±0.08 <sup>ABb</sup> | 1.52±0.11 <sup>ABb</sup> |
|                           | EtOH | 0.85 ± 0.16 <sup>EFGe</sup> | 0.58 ± 0.04 <sup>Hd</sup>    | 0.14 ± 0.04 <sup>Gd</sup>  | 0.13±0.01 <sup>Dc</sup>  | 0.3±0.08 <sup>CDc</sup>  | 1.47±0.09 <sup>Ba</sup>  |
| <i>Durvillaea</i> sp.     | EA   | 0.68 ± 0.11 <sup>EFHb</sup> | 6.45 ± 0.09 <sup>Aa</sup>    | -                          | 1.49±0.09 <sup>Bb</sup>  | 0.37±0.01 <sup>CDa</sup> | -                        |
|                           | ACE  | 0.8 ± 0.15 <sup>EFHcd</sup> | 0.67 ± 0.04 <sup>IJKbc</sup> | 0.8 ± 0.22 <sup>Aa</sup>   | 0.03±0.01 <sup>DEd</sup> | 0.09±0.01 <sup>Ed</sup>  | 1.40±0.02 <sup>Bb</sup>  |
|                           | MeOH | 0.48 ± 0.70 <sup>GHJd</sup> | 0.03 ± 0.01 <sup>Kd</sup>    | 0.44 ± 0.11 <sup>Cb</sup>  | -                        | 0.36±0.04 <sup>CDc</sup> | 0.51±0.04 <sup>DEc</sup> |
|                           | EtOH | 0.03 ± 0.01 <sup>Jd</sup>   | 0.74 ± 0.06 <sup>Gcc</sup>   | 0.17 ± 0.05 <sup>FGc</sup> | -                        | 0.07±0.01 <sup>Ed</sup>  | 0.20±0.01 <sup>Fe</sup>  |
|                           | EA   | 0.09 ± 0.01 <sup>IJe</sup>  | 6.33 ± 0.01 <sup>Aa</sup>    | -                          | 0.41±0.03 <sup>Cc</sup>  | 0.02±0.01 <sup>Eb</sup>  | -                        |

All values are expressed as the mean ± SD and performed in triplicates. Different letters (a, b, c, d, e) within the same column are significantly different ( $p < 0.05$ ) samples within the solvent whereas letters (A, B, C, D, E) within the same column are significantly different ( $p < 0.05$ ) samples within the species. Six species of seaweed are reported based on dry weight. CE (catechin equivalents), QE (quercetin equivalents), GAE (gallic acid equivalents), PGE (phloroglucinol equivalents). TFC (total flavonoids content), TPC (total phenolic content), TCT (total tannins content), DMBA (2,4-dimethoxybenzaldehyde assay), PBA (Prussian blue assay), FDA (Folin-Denis Assay). The abbreviation of solvents expressed are ACE (Acetone), MeOH (Methanol), EtOH (Ethanol), EA (Ethyl Acetate).

**Table S3:** Estimation of freeze-dried free phenolic's antioxidant potential of seaweed species extracted by the conventional and non-conventional method.

| Samples                           | Solvents | DPPH<br>(mg TE/g)          | FRAP<br>(mg TE/g)          | ABTS<br>(mg TE/g)           | FICA<br>(mg EDTA/g)          | ·OH-RSA (mg<br>TE/g)       | TAC<br>(mg TE/g)            | RPA<br>(mg TE/g)            |
|-----------------------------------|----------|----------------------------|----------------------------|-----------------------------|------------------------------|----------------------------|-----------------------------|-----------------------------|
| <b>Ultrasonication Extraction</b> |          |                            |                            |                             |                              |                            |                             |                             |
| <i>Cystophora</i> sp.             | 70% ACE  | 47.70 ± 0.07 <sup>Aa</sup> | 38.46 ± 0.04 <sup>Aa</sup> | 53.98 ± 0.20 <sup>Aa</sup>  | 0.8 ± 0.01 <sup>C-Eb</sup>   | 10.23 ± 0.21 <sup>Ec</sup> | 73.74 ± 0.30 <sup>Aa</sup>  | 8.60 ± 0.02 <sup>Id</sup>   |
|                                   | 70% MeOH | 41.03 ± 0.07 <sup>Ba</sup> | 19.84 ± 0.22 <sup>Fb</sup> | 48.54 ± 0.18 <sup>Ba</sup>  | 0.03 ± 0.01 <sup>Fc</sup>    | 8.95 ± 0.14 <sup>Fc</sup>  | 18.71 ± 1.04 <sup>Ic</sup>  | 10.51 ± 0.05 <sup>Gc</sup>  |
|                                   | 70% EtOH | 4.96 ± 0.01 <sup>Ib</sup>  | 16.81 ± 0.22 <sup>Hc</sup> | 34.21 ± 0.18 <sup>Ca</sup>  | 0.22 ± 0.01 <sup>EFb</sup>   | -                          | 31.94 ± 1.20 <sup>Fb</sup>  | 23.64 ± 0.12 <sup>Ba</sup>  |
|                                   | EA       | -                          | -                          | -                           | 0.97 ± 0.01 <sup>CDa</sup>   | -                          | -                           | -                           |
| <i>Phyllospora comosa</i>         | 70% ACE  | 37.52 ± 0.07 <sup>Cb</sup> | 15.63 ± 0.12 <sup>Id</sup> | 14.65 ± 0.84 <sup>Gd</sup>  | 3.09 ± 0.11 <sup>Aa</sup>    | 41.64 ± 1.10 <sup>Ba</sup> | 48.38 ± 0.76 <sup>Cc</sup>  | 25.45 ± 0.09 <sup>Aa</sup>  |
|                                   | 70% MeOH | 4.76 ± 0.01 <sup>Hlc</sup> | 4.79 ± 0.23 <sup>Kd</sup>  | 24.36 ± 0.27 <sup>Ec</sup>  | 0.99 ± 0.01 <sup>CDa</sup>   | 53.07 ± 0.96 <sup>Aa</sup> | 32.84 ± 0.60 <sup>Fa</sup>  | 18.22 ± 0.18 <sup>Da</sup>  |
|                                   | 70% EtOH | 4.69 ± 0.01 <sup>Gd</sup>  | 9.96 ± 0.19 <sup>Id</sup>  | 24.18 ± 0.10 <sup>Eb</sup>  | 0.95 ± 0.01 <sup>CDa</sup>   | 4.93 ± 0.11 <sup>Ga</sup>  | 40.46 ± 0.92 <sup>Da</sup>  | 7.24 ± 0.04 <sup>Ke</sup>   |
|                                   | EA       | 0.02 ± 0.01 <sup>Ia</sup>  | -                          | 0.46 ± 0.01 <sup>Ja</sup>   | 0.01 ± 0.04 <sup>Fb</sup>    | -                          | -                           | -                           |
| <i>Sargassum</i> sp.              | 70% ACE  | 35.40 ± 0.03 <sup>Dc</sup> | 29.29 ± 0.23 <sup>Bb</sup> | 35.03 ± 0.40 <sup>Cb</sup>  | 0.53 ± 0.01 <sup>D-Fbc</sup> | 13.72 ± 0.36 <sup>Db</sup> | 53.79 ± 0.35 <sup>Bbb</sup> | 22.47 ± 0.12 <sup>Cb</sup>  |
|                                   | 70% MeOH | 4.70 ± 0.01 <sup>Ic</sup>  | 26.62 ± 0.20 <sup>Ca</sup> | 20.03 ± 0.31 <sup>Fd</sup>  | 0.21 ± 0.01 <sup>EFb</sup>   | -                          | 30.64 ± 0.63 <sup>FGb</sup> | 8.82 ± 0.03 <sup>Ib</sup>   |
|                                   | 70% EtOH | 4.68 ± 0.01 <sup>Id</sup>  | 21.12 ± 0.16 <sup>Ea</sup> | 20.15 ± 0.75 <sup>Fc</sup>  | 0.21 ± 0.01 <sup>EFb</sup>   | -                          | 29.63 ± 0.46 <sup>Gb</sup>  | 14.10 ± 0.18 <sup>Fb</sup>  |
|                                   | EA       | -                          | 0.06 ± 0.01 <sup>Ma</sup>  | 0.27 ± 0.03 <sup>Ib</sup>   | 0.02 ± 0.02 <sup>DEFb</sup>  | -                          | -                           | -                           |
| <i>Ecklonia radiata</i>           | 70% ACE  | 33.33 ± 0.05 <sup>Ed</sup> | 21.83 ± 0.12 <sup>Dc</sup> | 15.03 ± 0.45 <sup>Gd</sup>  | 0.87 ± 0.01 <sup>C-Dbc</sup> | 41.16 ± 0.72 <sup>Ba</sup> | 37.45 ± 1.51 <sup>Ea</sup>  | 10.34 ± 0.03 <sup>GHc</sup> |
|                                   | 70% MeOH | 5.01 ± 0.01 <sup>Gb</sup>  | 16.66 ± 0.09 <sup>Hc</sup> | 31.14 ± 0.99 <sup>Db</sup>  | -                            | -                          | 12.19 ± 0.76 <sup>Jd</sup>  | 16.56 ± 0.08 <sup>Eb</sup>  |
|                                   | 70% EtOH | 5.06 ± 0.02 <sup>Ga</sup>  | 17.44 ± 0.16 <sup>Gb</sup> | 11.64 ± 0.68 <sup>Hd</sup>  | 0.32 ± 0.01 <sup>D-Fb</sup>  | -                          | 25.52 ± 1.51 <sup>Hc</sup>  | 8.02 ± 0.08 <sup>Id</sup>   |
|                                   | EA       | -                          | -                          | -                           | 1.48 ± 0.01 <sup>BCa</sup>   | -                          | -                           | -                           |
| <i>Durvillaea</i> sp.             | 70% ACE  | 20.54 ± 0.04 <sup>Fe</sup> | 1.81 ± 0.08 <sup>Le</sup>  | 18.87 ± 0.07 <sup>Fc</sup>  | 0.42 ± 0.01 <sup>D-Fc</sup>  | -                          | 17.31 ± 0.08 <sup>Ie</sup>  | 0.79 ± 0.16 <sup>Le</sup>   |
|                                   | 70% MeOH | 4.69 ± 0.01 <sup>Ic</sup>  | 4.86 ± 0.12 <sup>Kd</sup>  | 9.94 ± 0.02 <sup>Ie</sup>   | 0.21 ± 0.01 <sup>EFb</sup>   | 16.17 ± 0.01 <sup>Cb</sup> | 5.44 ± 0.15 <sup>Ke</sup>   | 10.24 ± 0.04 <sup>Hd</sup>  |
|                                   | 70% EtOH | 4.82 ± 0.01 <sup>Hc</sup>  | 10.21 ± 0.08 <sup>Id</sup> | 11.08 ± 0.40 <sup>HId</sup> | 0.22 ± 0.01 <sup>EFb</sup>   | 4.12 ± 0.07 <sup>Gb</sup>  | 6.95 ± 0.15 <sup>Kd</sup>   | 10.25 ± 0.05 <sup>GHc</sup> |
|                                   | EA       | -                          | 0.06 ± 0.01 <sup>Ma</sup>  | -                           | 1.81 ± 0.01 <sup>Ba</sup>    | -                          | -                           | -                           |
| <b>Conventional Extraction</b>    |          |                            |                            |                             |                              |                            |                             |                             |
| <i>Cystophora</i> sp.             | 70% ACE  | 45.65 ± 0.08 <sup>Aa</sup> | 30.42 ± 0.29 <sup>Aa</sup> | 39.09 ± 0.22 <sup>Aa</sup>  | -                            | -                          | 77.45 ± 0.17 <sup>Aa</sup>  | 6.80 ± 0.03 <sup>Kd</sup>   |
|                                   | 70% MeOH | 41.74 ± 0.07 <sup>Ca</sup> | 29.97 ± 0.12 <sup>Aa</sup> | 37.78 ± 0.13 <sup>Ba</sup>  | 0.01 ± 0.01 <sup>Id</sup>    | -                          | 40.46 ± 0.46 <sup>Ca</sup>  | 11.29 ± 0.02 <sup>Ba</sup>  |
|                                   | 70% EtOH | 45.34 ± 0.07 <sup>Ba</sup> | 31.35 ± 0.23 <sup>Ea</sup> | 38 ± 0.32 <sup>Aa</sup>     | 0.19 ± 0.01 <sup>Hd</sup>    | -                          | 73.44 ± 0.30 <sup>Ba</sup>  | 20.74 ± 0.09 <sup>Aa</sup>  |
|                                   | EA       | 3.15 ± 0.06 <sup>Kb</sup>  | -                          | -                           | 0.84 ± 0.01 <sup>Dd</sup>    | -                          | -                           | -                           |
| <i>Sargassum</i> sp.              | 70% ACE  | 32.11 ± 0.16 <sup>Ec</sup> | 28.00 ± 0.16 <sup>Bb</sup> | 20.06 ± 0.27 <sup>Cb</sup>  | 0.17 ± 0.01 <sup>Hc</sup>    | -                          | 33.74 ± 0.52 <sup>Db</sup>  | 8.08 ± 0.07 <sup>Fb</sup>   |
|                                   | 70% MeOH | 4.86 ± 0.04 <sup>Ic</sup>  | 15.68 ± 0.23 <sup>Db</sup> | 19.97 ± 0.48 <sup>Bc</sup>  | 0.19 ± 0.01 <sup>Hc</sup>    | -                          | 8.58 ± 0.17 <sup>Id</sup>   | 6.75 ± 0.03 <sup>Kd</sup>   |
|                                   | 70% EtOH | 4.91 ± 0.03 <sup>Ic</sup>  | 14.85 ± 0.31 <sup>Ea</sup> | 18.16 ± 0.46 <sup>Db</sup>  | 0.17 ± 0.01 <sup>He</sup>    | -                          | 13.99 ± 0.17 <sup>Id</sup>  | 7.66 ± 0.03 <sup>Ad</sup>   |
|                                   | EA       | 2.88 ± 0.19 <sup>Lc</sup>  | -                          | -                           | 0.21 ± 0.02 <sup>He</sup>    | -                          | -                           | -                           |
| <i>Phyllospora comosa</i>         | 70% ACE  | 35.02 ± 0.09 <sup>Db</sup> | 12.12 ± 0.23 <sup>Fd</sup> | 17.37 ± 0.86 <sup>DEc</sup> | 0.80 ± 0.01 <sup>Da</sup>    | -                          | 18.01 ± 0.63 <sup>Hd</sup>  | 7.41 ± 0.03 <sup>Ic</sup>   |
|                                   | 70% MeOH | 4.74 ± 0.01 <sup>IId</sup> | 6.02 ± 0.12 <sup>Id</sup>  | 9.57 ± 0.03 <sup>Fb</sup>   | 0.56 ± 0.01 <sup>Ea</sup>    | 20.26 ± 0.08 <sup>Aa</sup> | 13.81 ± 0.31 <sup>Ic</sup>  | 9.40 ± 0.04 <sup>Eb</sup>   |
|                                   | 70% EtOH | 4.93 ± 0.01 <sup>Ic</sup>  | 8.67 ± 0.29 <sup>Ec</sup>  | 9.93 ± 0.04 <sup>Fc</sup>   | 0.99 ± 0.01 <sup>Ba</sup>    | 3.32 ± 0.13 <sup>Db</sup>  | 21.78 ± 0.09 <sup>Fb</sup>  | 10.62 ± 0.02 <sup>Hb</sup>  |

|                         |          |                            |                            |                            |                            |                            |                            |                           |
|-------------------------|----------|----------------------------|----------------------------|----------------------------|----------------------------|----------------------------|----------------------------|---------------------------|
|                         | EA       | -                          | 0.05 ± 0.01 <sup>La</sup>  | -                          | 10.92 ± 0.07 <sup>Ca</sup> | -                          | -                          | 0.42 ± 0.02 <sup>Na</sup> |
| <i>Ecklonia radiata</i> | 70% ACE  | 30.29 ± 0.07 <sup>Fd</sup> | 16.84 ± 0.12 <sup>Cc</sup> | 19.56 ± 0.58 <sup>Cb</sup> | 0.39 ± 0.01 <sup>Fc</sup>  | 2.17 ± 0.01 <sup>Ea</sup>  | 21.91 ± 0.17 <sup>Fc</sup> | 6.24 ± 0.02 <sup>Le</sup> |
|                         | 70% MeOH | 30.01 ± 0.07 <sup>Gb</sup> | 10.31 ± 0.12 <sup>Hc</sup> | 16.43 ± 0.40 <sup>Ec</sup> | 0.18 ± 0.01 <sup>Hb</sup>  | -                          | 23.49 ± 0.15 <sup>Eb</sup> | 7.04 ± 0.02 <sup>Jc</sup> |
|                         | 70% EtOH | 27.77 ± 0.12 <sup>Hb</sup> | 11.17 ± 0.19 <sup>Gb</sup> | 10.44 ± 0.23 <sup>Fc</sup> | 0.33 ± 0.01 <sup>FGc</sup> | -                          | 20.98 ± 0.23 <sup>Gc</sup> | 7.89 ± 0.02 <sup>Gc</sup> |
| <i>Durvillaea</i> sp.   | EA       | 2.51 ± 0.04 <sup>Md</sup>  | -                          | -                          | 4.25 ± 0.07 <sup>Ac</sup>  | -                          | -                          | -                         |
|                         | 70% ACE  | 30.29 ± 0.05 <sup>Fd</sup> | 9.98 ± 0.08 <sup>He</sup>  | 9.86 ± 0.01 <sup>Fd</sup>  | 0.20 ± 0.01 <sup>Hc</sup>  | -                          | 13.31 ± 0.09 <sup>Ie</sup> | 9.65 ± 0.03 <sup>Da</sup> |
|                         | 70% MeOH | 4.70 ± 0.02 <sup>IJd</sup> | 4.91 ± 0.20 <sup>Ke</sup>  | 9.75 ± 0.02 <sup>Fd</sup>  | 0.30 ± 0.01 <sup>Gb</sup>  | 15.60 ± 0.14 <sup>Bb</sup> | 4.09 ± 0.04 <sup>Le</sup>  | 4.17 ± 0.02 <sup>Me</sup> |
|                         | 70% EtOH | 4.78 ± 0.02 <sup>IJc</sup> | 5.65 ± 0.16 <sup>Jd</sup>  | 9.75 ± 0.02 <sup>Fc</sup>  | 0.35 ± 0.01 <sup>FGb</sup> | 6.50 ± 0.13 <sup>Ca</sup>  | 5.34 ± 0.09 <sup>Ke</sup>  | 4.20 ± 0.03 <sup>Me</sup> |
|                         | EA       | 4.57 ± 0.03 <sup>Ia</sup>  | -                          | -                          | 0.81 ± 0.01 <sup>Db</sup>  | -                          | -                          | -                         |

All values are expressed as the mean ± SD and performed in triplicates. Different letters (<sup>a, b, c, d, e</sup>) within the same column are significantly different ( $p < 0.05$ ) samples within the solvent whereas letteres (<sup>A, B, C, D, E</sup>) within the same column are significantly different ( $p < 0.05$ ) samples within the species. Six species of seaweed are reported based on dry weight. TE (Trolox equivalents), EDTA (ethylenediaminetetraacetic acid), FRAP (ferric reducing antioxidant power), DPPH (2,2'-diphenyl-1-picrylhydrazyl), TAC (total antioxidant capacity), ABTS (2,2'-azino-bis-3-ethylbenzothiazoline-6-sulfonic acid), RPA: reducing power assay; ·OH-RSA: hydroxyl radical scavenging activity; FICA: ferrous ion chelating activity. The abbreviation of solvents expressed are ACE (Acetone), MeOH (Methanol), EtOH (Ethanol), EA (Ethyl Acetate).

**Table S4:** Estimation of freeze-dried bound antioxidant potential of seaweed species extracted by the conventional and non-conventional method.

| Samples                       | Solvents | DPPH<br>(mg TE/g)            | FRAP<br>(mg TE/g)            | ABTS<br>(mg TE/g)            | FICA<br>(mg EDTA/g)           | ·OH-RSA (mg<br>TE/g)       | TAC<br>(mg TE/g)           | RPA<br>(mg TE/g)             |
|-------------------------------|----------|------------------------------|------------------------------|------------------------------|-------------------------------|----------------------------|----------------------------|------------------------------|
| <b>Ultrasonication</b>        |          |                              |                              |                              |                               |                            |                            |                              |
| <i>Cystophora</i> sp.         | ACE      | 2.63 ± 0.14 <sup>Bb</sup>    | 7.15 ± 0.43 <sup>Ca</sup>    | 10.17 ± 0.04 <sup>Aa</sup>   | 0.96 ± 0.01 <sup>ABCDbc</sup> | 3.03 ± 0.27 <sup>Md</sup>  | 2.87 ± 0.24 <sup>EFa</sup> | 8.62 ± 0.17 <sup>Aa</sup>    |
|                               | MeOH     | 2.58 ± 0.24 <sup>Bb</sup>    | 6.25 ± 0.1 <sup>Db</sup>     | 10.11 ± 0.03 <sup>ABa</sup>  | 0.94 ± 0.01 <sup>BCDa</sup>   | 53.73 ± 1.52 <sup>Ba</sup> | 10.53 ± 0.28 <sup>Da</sup> | 5.60 ± 0.19 <sup>Cb</sup>    |
| <i>Phyllospora<br/>comosa</i> | EtOH     | 2.33 ± 0.19 <sup>BCb</sup>   | 8.19 ± 0.24 <sup>Ba</sup>    | 10.03 ± 0.07 <sup>ABa</sup>  | 0.83 ± 0.01 <sup>EFb</sup>    | -                          | 1.36 ± 0.02 <sup>Fc</sup>  | 5.63 ± 0.57 <sup>Ca</sup>    |
|                               | EA       | 1.42 ± 0.5 <sup>Eb</sup>     | 0.39 ± 0.05 <sup>MNc</sup>   | 6.58 ± 0.35 <sup>Ib</sup>    | 0.49 ± 0.03 <sup>Hb</sup>     | 9.06 ± 0.8 <sup>Ib</sup>   | 20.24 ± 0.75 <sup>Cc</sup> | 1.95 ± 0.6 <sup>GHIb</sup>   |
|                               | ACE      | -                            | 1.38 ± 0.09 <sup>HIJKc</sup> | 8.34 ± 0.45 <sup>DEFc</sup>  | 1.06 ± 0.06 <sup>Aa</sup>     | 11.96 ± 0.2 <sup>Fc</sup>  | 0.34 ± 0.03 <sup>Fd</sup>  | 0.32 ± 0.01 <sup>JKc</sup>   |
|                               | MeOH     | -                            | 2.99 ± 0.04 <sup>Fd</sup>    | 8.84 ± 0.62 <sup>CDc</sup>   | 0.92 ± 0.07 <sup>CDEa</sup>   | 12.35 ± 0.14 <sup>Eb</sup> | 0.68 ± 0.01 <sup>Fd</sup>  | 2.24 ± 0.12 <sup>FGc</sup>   |
|                               | EtOH     | -                            | 1.06 ± 0.05 <sup>KLd</sup>   | 8.03 ± 0.12 <sup>Efc</sup>   | 0.65 ± 0.06 <sup>Gc</sup>     | 10.45 ± 0.44 <sup>Ha</sup> | 0.49 ± 0.05 <sup>Fe</sup>  | -                            |
|                               | EA       | 2.06 ± 0.1 <sup>CDa</sup>    | 0.53 ± 0.05 <sup>LMNb</sup>  | 8.57 ± 0.10 <sup>DEa</sup>   | 1.02 ± 0.05 <sup>ABa</sup>    | 33.23 ± 2.25 <sup>Ca</sup> | -                          | 2.90 ± 0.25 <sup>Ea</sup>    |
| <i>Sargassum</i> sp.          | ACE      | 3.38 ± 0.16 <sup>Aa</sup>    | 7.44 ± 0.46 <sup>Ca</sup>    | 10.13 ± 0.01 <sup>DEa</sup>  | 0.93 ± 0.01 <sup>BCDc</sup>   | 3.02 ± 0.09 <sup>Ne</sup>  | 2.21 ± 4.26 <sup>Fb</sup>  | 6.02 ± 0.29 <sup>Cb</sup>    |
|                               | MeOH     | 3.19 ± 0.22 <sup>Aa</sup>    | 8.96 ± 0.27 <sup>Aa</sup>    | 10.10 ± 0.01 <sup>ABa</sup>  | 0.90 ± 0.01 <sup>DEa</sup>    | 3.66 ± 0.11 <sup>Kd</sup>  | 1.94 ± 0.09 <sup>Fb</sup>  | 6.72 ± 0.17 <sup>Ba</sup>    |
|                               | EtOH     | 3.15 ± 0.08 <sup>Aa</sup>    | 6.50 ± 0.28 <sup>Db</sup>    | 10.08 ± 0.06 <sup>ABa</sup>  | 0.80 ± 0.01 <sup>Fb</sup>     | 1.13 ± 0.05 <sup>Pd</sup>  | 2.00 ± 0.02 <sup>Fb</sup>  | 4.43 ± 0.26 <sup>Db</sup>    |
|                               | EA       | 0.62 ± 0.04 <sup>Fc</sup>    | 0.03 ± 0.01 <sup>Ne</sup>    | 4.59 ± 0.13 <sup>Jc</sup>    | 0.51 ± 0.02 <sup>Hb</sup>     | -                          | 40.30 ± 4.26 <sup>Aa</sup> | -                            |
| <i>Ecklonia<br/>radiata</i>   | ACE      | 0.76 ± 0.07 <sup>Fd</sup>    | 2.24 ± 0.17 <sup>Gb</sup>    | 9.90 ± 0.12 <sup>ABa</sup>   | 1 ± 0.01 <sup>ABCab</sup>     | 93.33 ± 5.20 <sup>Ra</sup> | 0.37 ± 0.01 <sup>Fe</sup>  | 1.57 ± 0.08 <sup>HIId</sup>  |
|                               | MeOH     | -                            | 4.10 ± 0.07 <sup>Ec</sup>    | 9.77 ± 0.18 <sup>ABa</sup>   | 0.66 ± 0.02 <sup>Gb</sup>     | 11.94 ± 0.71 <sup>Gc</sup> | 3.16 ± 0.08 <sup>Fd</sup>  | 2.53 ± 0.12 <sup>EFc</sup>   |
|                               | EtOH     | 0.45 ± 0.04 <sup>Fc</sup>    | 1.73 ± 0.03 <sup>GHIc</sup>  | 9.46 ± 0.25 <sup>BCb</sup>   | 0.96 ± 0.02 <sup>ABCDa</sup>  | 3.23 ± 0.05 <sup>Lc</sup>  | 0.91 ± 0.09 <sup>Fd</sup>  | 0.60 ± 0.01 <sup>Jd</sup>    |
|                               | EA       | -                            | 0.84 ± 0.03 <sup>KLMa</sup>  | 6.75 ± 0.34 <sup>FIIb</sup>  | 0.31 ± 0.02 <sup>Ic</sup>     | -                          | 33.79 ± 2.48 <sup>Bb</sup> | 1.88 ± 0.02 <sup>GHIb</sup>  |
| <i>Durvillaea</i> sp.         | ACE      | 1.95 ± 0.11 <sup>Dc</sup>    | 1.76 ± 0.09 <sup>GHIbc</sup> | 9.55 ± 0.07 <sup>ABb</sup>   | 0.64 ± 0.01 <sup>Gd</sup>     | 13.12 ± 0.73 <sup>Db</sup> | 1.20 ± 0.08 <sup>Fc</sup>  | 3.89 ± 0.12 <sup>Dc</sup>    |
|                               | MeOH     | 0.55 ± 0.01 <sup>Dc</sup>    | 1.52 ± 0.03 <sup>HIJe</sup>  | 7.73 ± 0.28 <sup>FGc</sup>   | 0.96 ± 0.01 <sup>BCDa</sup>   | 2.05 ± 0.05 <sup>Oe</sup>  | 1.56 ± 0.07 <sup>Fc</sup>  | 1.75 ± 0.15 <sup>GHIId</sup> |
|                               | EtOH     | 0.66 ± 0.01 <sup>Fc</sup>    | 1.17 ± 0.04 <sup>IJKd</sup>  | 7.29 ± 0.24 <sup>GHd</sup>   | 0.79 ± 0.05 <sup>Fb</sup>     | 10.16 ± 0.14 <sup>Ib</sup> | 2.41 ± 0.14 <sup>Fa</sup>  | 1.4 ± 0.01 <sup>Ic</sup>     |
|                               | EA       | 2.01 ± 0.03 <sup>Fc</sup>    | 0.19 ± 0.02 <sup>Nd</sup>    | 6.40 ± 0.11 <sup>Ib</sup>    | 0.12 ± 0.01 <sup>Jd</sup>     | -                          | 5.86 ± 0.24 <sup>Ed</sup>  | 2 ± 0.07 <sup>FGHb</sup>     |
| <b>Conventional</b>           |          |                              |                              |                              |                               |                            |                            |                              |
| <i>Cystophora</i> sp.         | ACE      | 1.08 ± 0.31 <sup>BCa</sup>   | 2.12 ± 0.16 <sup>Cb</sup>    | 3.41 ± 0.01 <sup>Aa</sup>    | 0.24 ± 0.06 <sup>BCa</sup>    | 0.7 ± 0.14 <sup>Ed</sup>   | 0.18 ± 0.05 <sup>Dc</sup>  | 1.12 ± 0.09 <sup>B-Db</sup>  |
|                               | MeOH     | 1.21 ± 0.29 <sup>ABa</sup>   | 2.91 ± 0.24 <sup>Aa</sup>    | 3.33 ± 0.17 <sup>ABa</sup>   | 0.07 ± 0.01 <sup>HIId</sup>   | 2.2 ± 0.47 <sup>Ed</sup>   | 5.54 ± 1.14 <sup>Cb</sup>  | 3.91 ± 0.71 <sup>Aa</sup>    |
|                               | EtOH     | 1.15 ± 0.32 <sup>ABa</sup>   | 2.13 ± 0.07 <sup>Ca</sup>    | 3.4 ± 0.03 <sup>Aa</sup>     | 0.18 ± 0.03 <sup>Eb</sup>     | 3.72 ± 0.29 <sup>Db</sup>  | 0.35 ± 0.08 <sup>Db</sup>  | 1.27 ± 0.19 <sup>Bb</sup>    |
|                               | EA       | 1.24 ± 0.03 <sup>Ab</sup>    | 0.25 ± 0.03 <sup>GHIb</sup>  | 3.41 ± 0.07 <sup>Aa</sup>    | 0.09 ± 0.01 <sup>HIc</sup>    | -                          | 17.59 ± 2.03 <sup>Aa</sup> | 2.75 ± 0.64 <sup>Aa</sup>    |
| <i>Sargassum</i> sp.          | ACE      | 0.84 ± 0.19 <sup>DEb</sup>   | 2.34 ± 0.31 <sup>Ba</sup>    | 3.37 ± 0.08 <sup>ABab</sup>  | 0.19 ± 0.03 <sup>DEb</sup>    | 23.37 ± 2.22 <sup>Aa</sup> | 1.01 ± 0.03 <sup>Da</sup>  | 2.47 ± 0.37 <sup>Aa</sup>    |
|                               | MeOH     | 1.11 ± 0.28 <sup>ABCa</sup>  | 2.15 ± 0.09 <sup>Cb</sup>    | 3.37 ± 0.01 <sup>Aa</sup>    | 0.27 ± 0.01 <sup>Ba</sup>     | 3.6 ± 0.58 <sup>Dc</sup>   | 0.27 ± 0.07 <sup>Db</sup>  | 1.09 ± 0.18 <sup>B-Db</sup>  |
|                               | EtOH     | 0.97 ± 0.25 <sup>CDb</sup>   | 2.12 ± 0.54 <sup>Ca</sup>    | 3.38 ± 0.07 <sup>Aa</sup>    | 0.31 ± 0.09 <sup>Aa</sup>     | 0.39 ± 0.05 <sup>Gd</sup>  | 0.77 ± 0.17 <sup>Da</sup>  | 1.24 ± 0.27 <sup>BCa</sup>   |
|                               | EA       | 0.56 ± 0.10 <sup>FGc</sup>   | 0.4 ± 0.05 <sup>FGa</sup>    | 2.88 ± 0.16 <sup>CDb</sup>   | 0.14 ± 0.04 <sup>Fa</sup>     | -                          | 16.64 ± 4.63 <sup>Da</sup> | 0.44 ± 0.12 <sup>GHIb</sup>  |
| <i>Ecklonia<br/>radiata</i>   | ACE      | 11.67 ± 0.09 <sup>GHIc</sup> | 4.04 ± 0.23 <sup>DEc</sup>   | 5.79 ± 0.86 <sup>BCabc</sup> | 0.27 ± 0.01 <sup>Fc</sup>     | -                          | 6 ± 0.63 <sup>Dc</sup>     | 2.47 ± 0.03 <sup>BCb</sup>   |
|                               | MeOH     | 1.58 ± 0.01 <sup>FGb</sup>   | 2.01 ± 0.12 <sup>Ec</sup>    | 3.19 ± 0.03 <sup>ABa</sup>   | 0.19 ± 0.01 <sup>Bc</sup>     | 6.75 ± 0.08 <sup>Cb</sup>  | 4.6 ± 0.31 <sup>Db</sup>   | 3.13 ± 0.04 <sup>BCDEb</sup> |



|                           |      |                             |                             |                            |                              |                           |                           |                             |
|---------------------------|------|-----------------------------|-----------------------------|----------------------------|------------------------------|---------------------------|---------------------------|-----------------------------|
| <i>Phyllospora comosa</i> | EtOH | 1.64 ± 0.01 <sup>HIc</sup>  | 2.89 ± 0.29 <sup>DB</sup>   | 3.31 ± 0.04 <sup>ABa</sup> | 0.33 ± 0.01 <sup>FGc</sup>   | 1.11 ± 0.13 <sup>Ca</sup> | 7.26 ± 0.09 <sup>Dc</sup> | 3.54 ± 0.02 <sup>EFb</sup>  |
|                           | EA   | -                           | 0.02 ± 0.01 <sup>HIc</sup>  | -                          | 0.31 ± 0.07 <sup>Fa</sup>    | -                         | -                         | 0.14 ± 0.02 <sup>Ic</sup>   |
|                           | ACE  | 0.06 ± 0.01 <sup>KLMe</sup> | 0.57 ± 0.09 <sup>Fd</sup>   | 2.87 ± 0.57 <sup>CDc</sup> | 0.18 ± 0.02 <sup>Eb</sup>    | 5.84 ± 0.54 <sup>Bb</sup> | -                         | 0.86 ± 0.09 <sup>DEb</sup>  |
|                           | MeOH | 0.24 ± 0.01 <sup>IJc</sup>  | 0.54 ± 0.05 <sup>Fd</sup>   | 2.99 ± 0.30 <sup>CDb</sup> | 0.22 ± 0.02 <sup>CDb</sup>   | 6.37 ± 0.34 <sup>Ba</sup> | -                         | 0.54 ± 0.07 <sup>FG</sup>   |
|                           | EtOH | 0.2 ± 0.02 <sup>IJKc</sup>  | 0.51 ± 0.04 <sup>Fc</sup>   | 2.73 ± 0.45 <sup>DEb</sup> | 0.19 ± 0.01 <sup>DEb</sup>   | 1.19 ± 0.09 <sup>Fc</sup> | -                         | 1.28 ± 0.35 <sup>Ba</sup>   |
| <i>Durvillaea</i> sp.     | EA   | 0.69 ± 0.03 <sup>EFb</sup>  | 0.13 ± 0.02 <sup>Cc</sup>   | 2.88 ± 0.11 <sup>CDb</sup> | 0.1 ± 0.03 <sup>GHbc</sup>   | -                         | -                         | 0.01 ± 0.01 <sup>Ic</sup>   |
|                           | ACE  | 0.25 ± 0.07 <sup>IJd</sup>  | 0.26 ± 0.02 <sup>GHe</sup>  | 3 ± 0.22 <sup>Cbc</sup>    | 0.07 ± 0.01 <sup>Id</sup>    | 4.56 ± 0.76 <sup>Cc</sup> | -                         | 0.19 ± 0.06 <sup>Ic</sup>   |
|                           | MeOH | 0.04 ± 0.01 <sup>LMd</sup>  | 1.29 ± 0.03 <sup>Ec</sup>   | 2.85 ± 0.21 <sup>CDb</sup> | 0.26 ± 0.06 <sup>Ba</sup>    | 1.2 ± 0.09 <sup>Fe</sup>  | -                         | 0.95 ± 0.13 <sup>CDEb</sup> |
|                           | EtOH | -                           | 0.18 ± 0.05 <sup>HIId</sup> | 2.54 ± 0.13 <sup>Eb</sup>  | 0.31 ± 0.01 <sup>Aa</sup>    | -                         | -                         | 0.31 ± 0.01 <sup>GHc</sup>  |
|                           | EA   | 0.25 ± 0.07 <sup>LMc</sup>  | 0.03 ± 0.01 <sup>Id</sup>   | 1.87 ± 0.22 <sup>Fd</sup>  | 0.12 ± 0.03 <sup>FGHab</sup> | -                         | 8.01 ± 1.55 <sup>Bb</sup> | -                           |

All values are expressed as the mean ± SD and performed in triplicates. Different letters (<sup>a, b, c, d, e</sup>) within the same column are significantly different ( $p < 0.05$ ) samples within the solvent whereas letters (<sup>A, B, C, D, E</sup>) within the same column are significantly different ( $p < 0.05$ ) samples within the species. Six species of seaweed are reported based on dry weight. TE (Trolox equivalents), EDTA (ethylenediaminetetraacetic acid), FRAP (ferric reducing antioxidant power), DPPH (2,2'-diphenyl-1-picrylhydrazyl), TAC (total antioxidant capacity), ABTS (2,2'-azino-bis-3-ethylbenzothiazoline-6-sulfonic acid), RPA: reducing power assay; ·OH-RSA: hydroxyl radical scavenging activity; FICA: ferrous ion chelating activity. The abbreviation of solvents expressed are ACE (Acetone), MeOH (Methanol), EtOH (Ethanol), EA (Ethyl Acetate).

**Table S5.** Characterization of free phenolic compounds in different seaweed samples with different extraction methods by LC-ESI-QTOF-MS/MS

| No.                          | Proposed compounds                | Molecular Formula                                | RT (min) | Ionization (ESI <sup>+</sup> /ESI <sup>-</sup> ) | Molecular Weight | Theoretical (m/z) | Observed (m/z) | Error (ppm) | MS <sup>2</sup> Product ions | Seaweed                                                                     |
|------------------------------|-----------------------------------|--------------------------------------------------|----------|--------------------------------------------------|------------------|-------------------|----------------|-------------|------------------------------|-----------------------------------------------------------------------------|
| <b>Phenolic acid</b>         |                                   |                                                  |          |                                                  |                  |                   |                |             |                              |                                                                             |
| <b>Hydroxybenzoic acids</b>  |                                   |                                                  |          |                                                  |                  |                   |                |             |                              |                                                                             |
| 1                            | Protocatechuic acid 4-O-glucoside | C <sub>13</sub> H <sub>16</sub> O <sub>9</sub>   | 22.261   | [M-H] <sup>-</sup>                               | 316.0791         | 315.0718          | 315.0712       | -1.9        | 153                          | *Eeu                                                                        |
| 2                            | Gallic acid 4-O-glucoside         | C <sub>13</sub> H <sub>16</sub> O <sub>10</sub>  | 30.462   | **[M-H] <sup>-</sup>                             | 332.0768         | 331.0695          | 331.0691       | -1.2        | 169, 125                     | *Amu, Dmu, Aeu, Aau                                                         |
| 3                            | Gallic acid                       | C <sub>7</sub> H <sub>6</sub> O <sub>5</sub>     | 31.949   | [M-H] <sup>-</sup>                               | 170.0209         | 169.0136          | 169.0140       | 2.4         | 125                          | *Aec, Aac, Bac, Bec, Bethc, Bmc, Cec, Cac, Cethc, Dec, Dethc, Dmc, Eeu, Eau |
| 4                            | 3-O-Methylgallic acid             | C <sub>8</sub> H <sub>8</sub> O <sub>5</sub>     | 33.658   | [M-H] <sup>-</sup>                               | 184.0355         | 183.0282          | 183.0280       | -1.1        | 170, 142                     | *Dec, Dethc, Dmc                                                            |
| <b>Hydroxycinnamic acids</b> |                                   |                                                  |          |                                                  |                  |                   |                |             |                              |                                                                             |
| 5                            | 3-Feruloylquinic acid             | C <sub>17</sub> H <sub>20</sub> O <sub>9</sub>   | 4.687    | [M-H] <sup>-</sup>                               | 368.1081         | 367.1008          | 367.1012       | 1.1         | 298, 288, 192, 191           | Cmc                                                                         |
| 6                            | Feruloyl tartaric acid            | C <sub>14</sub> H <sub>14</sub> O <sub>9</sub>   | 4.958    | [M-H] <sup>-</sup>                               | 326.0641         | 325.0568          | 325.0562       | -1.9        | 193, 149                     | *Dac, Dethc, Eac, Eau, Cau                                                  |
| 7                            | Caffeic acid                      | C <sub>9</sub> H <sub>8</sub> O <sub>4</sub>     | 5.116    | [M-H] <sup>-</sup>                               | 180.0431         | 179.0358          | 179.0359       | 0.6         | 143, 133                     | Emc                                                                         |
| 8                            | Caffeoyl tartaric acid            | C <sub>13</sub> H <sub>12</sub> O <sub>9</sub>   | 5.426    | [M-H] <sup>-</sup>                               | 312.0504         | 311.0431          | 311.0438       | 2.3         | 161                          | *Emu, Dmu, Amu                                                              |
| 9                            | Ferulic acid                      | C <sub>10</sub> H <sub>10</sub> O <sub>4</sub>   | 5.539    | [M-H] <sup>-</sup>                               | 194.0585         | 193.0512          | 193.0516       | 2.1         | 178, 149, 134                | Eau                                                                         |
| 10                           | Isoferulic acid 3-sulfate         | C <sub>10</sub> H <sub>10</sub> O <sub>7</sub> S | 13.328   | [M-H] <sup>-</sup>                               | 274.0167         | 273.0094          | 273.0097       | 1.1         | 193, 178                     | Amu                                                                         |
| 11                           | <i>p</i> -Coumaroyl malic acid    | C <sub>13</sub> H <sub>12</sub> O <sub>7</sub>   | 17.011   | **[M-H] <sup>-</sup>                             | 280.0579         | 279.0506          | 279.0519       | 4.7         | 163, 119                     | *Emu, Aeu                                                                   |
| 12                           | Ferulic acid 4-O-glucuronide      | C <sub>16</sub> H <sub>18</sub> O <sub>10</sub>  | 17.199   | **[M-H] <sup>-</sup>                             | 370.0895         | 369.0822          | 369.0836       | 3.8         | 193                          | *Eau, Bmu                                                                   |
| 13                           | Rosmarinic acid                   | C <sub>18</sub> H <sub>16</sub> O <sub>8</sub>   | 17.543   | [M-H] <sup>-</sup>                               | 360.0822         | 359.0749          | 359.0766       | 4.8         | 179                          | Emc, Emu                                                                    |
| 14                           | Chicoric acid                     | C <sub>22</sub> H <sub>18</sub> O <sub>12</sub>  | 17.787   | [M-H] <sup>-</sup>                               | 474.0826         | 473.0753          | 473.0739       | -3.0        | 293, 311                     | Eac                                                                         |
| 15                           | <b>Chlorogenic acid</b>           | C <sub>16</sub> H <sub>18</sub> O <sub>9</sub>   | 19.896   | [M-H] <sup>-</sup>                               | 354.0923         | 353.0850          | 353.0849       | -0.3        | 253, 190, 144                | *Eac, Eau, Aeu                                                              |
| 16                           | 3- <i>p</i> -Coumaroylquinic acid | C <sub>16</sub> H <sub>18</sub> O <sub>8</sub>   | 20.108   | [M-H] <sup>-</sup>                               | 338.1023         | 337.0950          | 337.0943       | -2.1        | 265, 173, 162                | Eau                                                                         |
| 17                           | 3-Sinapoylquinic acid             | C <sub>18</sub> H <sub>22</sub> O <sub>10</sub>  | 23.306   | [M-H] <sup>-</sup>                               | 398.1177         | 397.1104          | 397.1109       | 1.3         | 233, 179                     | Eeu                                                                         |
| 18                           | Caffeic acid 3-O-glucuronide      | C <sub>15</sub> H <sub>16</sub> O <sub>10</sub>  | 24.346   | [M-H] <sup>-</sup>                               | 356.0756         | 355.0683          | 355.0674       | -2.5        | 179                          | *Bmc, Bac, Dmc, Emu, Amu                                                    |
| 19                           | 1,5-Dicaffeoylquinic acid         | C <sub>25</sub> H <sub>24</sub> O <sub>12</sub>  | 24.736   | [M-H] <sup>-</sup>                               | 516.1255         | 515.1182          | 515.1159       | -4.5        | 353, 335, 191, 179           | *Eec, Eau                                                                   |
| 20                           | 1,2,2'-Triferuloylgentiobiose     | C <sub>42</sub> H <sub>46</sub> O <sub>20</sub>  | 31.165   | [M-H] <sup>-</sup>                               | 870.2584         | 869.2511          | 869.2481       | -3.5        | 693, 517                     | *Aac, Deu, Bau                                                              |
| 21                           | <i>m</i> -Coumaric acid           | C <sub>9</sub> H <sub>8</sub> O <sub>3</sub>     | 32.821   | [M-H] <sup>-</sup>                               | 164.0477         | 163.0404          | 163.0408       | 2.5         | 119                          | Eethc                                                                       |
| 22                           | Sinapic acid                      | C <sub>11</sub> H <sub>12</sub> O <sub>5</sub>   | 32.135   | [M+H] <sup>+</sup>                               | 224.0672         | 225.0745          | 225.0746       | 0.4         | 205, 163                     | Eac                                                                         |

|                                     |                                                 |                                                 |        |                      |          |          |          |      |                    |                                 |
|-------------------------------------|-------------------------------------------------|-------------------------------------------------|--------|----------------------|----------|----------|----------|------|--------------------|---------------------------------|
| 23                                  | 1-Sinapoyl-2-feruloylgentiobiose                | C <sub>33</sub> H <sub>40</sub> O <sub>18</sub> | 33.699 | [M+H] <sup>+</sup>   | 724.2146 | 725.2219 | 725.2246 | 3.7  | 529, 499           | Aeu                             |
| <b>Hydroxyphenylpropanoic acids</b> |                                                 |                                                 |        |                      |          |          |          |      |                    |                                 |
| 24                                  | Dihydrocaffeic acid 3-O-glucuronide             | C <sub>15</sub> H <sub>18</sub> O <sub>10</sub> | 30.855 | [M-H] <sup>-</sup>   | 358.0868 | 357.0795 | 357.0798 | 0.8  | 181                | *Bac, Bec, Cmc                  |
| <b>Flavonoids</b>                   |                                                 |                                                 |        |                      |          |          |          |      |                    |                                 |
| <b>Flavanols</b>                    |                                                 |                                                 |        |                      |          |          |          |      |                    |                                 |
| 25                                  | Theaflavin                                      | C <sub>29</sub> H <sub>24</sub> O <sub>12</sub> | 16.799 | [M-H] <sup>-</sup>   | 564.1257 | 563.1184 | 563.1190 | 1.1  | 545                | *Dac, Emc, Eeu                  |
| 26                                  | (+)-Catechin                                    | C <sub>15</sub> H <sub>14</sub> O <sub>6</sub>  | 20.437 | **[M-H] <sup>-</sup> | 290.0786 | 289.0713 | 289.0716 | 1.0  | 245, 205, 179      | Eeu                             |
| 27                                  | (+)-Catechin 3-O-gallate                        | C <sub>22</sub> H <sub>18</sub> O <sub>10</sub> | 24.152 | [M-H] <sup>-</sup>   | 442.0876 | 441.0803 | 441.0816 | 3.0  | 289, 169, 125      | *Cac, Eeu                       |
| 28                                  | Theaflavin 3,3'-O-digallate                     | C <sub>43</sub> H <sub>32</sub> O <sub>20</sub> | 24.533 | [M-H] <sup>-</sup>   | 868.1448 | 867.1375 | 867.1373 | -0.2 | 715, 563, 545      | *Bac, Bmu, Beu, Bau             |
| 29                                  | 4''-O-Methylepigallocatechin 3-O-gallate        | C <sub>23</sub> H <sub>20</sub> O <sub>11</sub> | 28.257 | [M-H] <sup>-</sup>   | 472.1005 | 471.0932 | 471.0923 | -1.9 | 169, 319           | *Cac, Bec                       |
| 30                                  | (-)-Epigallocatechin                            | C <sub>15</sub> H <sub>14</sub> O <sub>7</sub>  | 30.714 | **[M-H] <sup>-</sup> | 306.0737 | 305.0664 | 305.0670 | 2.0  | 261, 219           | *Aau, Dau, Deu                  |
| 31                                  | 4'-O-Methyl(-)-epigallocatechin 7-O-glucuronide | C <sub>22</sub> H <sub>24</sub> O <sub>13</sub> | 34.052 | **[M-H] <sup>-</sup> | 496.1186 | 495.1113 | 495.1117 | 0.8  | 451, 313           | *Bmc, Bethc, Dmc, Cac, Dmc, Emc |
| <b>Flavones</b>                     |                                                 |                                                 |        |                      |          |          |          |      |                    |                                 |
| 32                                  | Isorhamnetin                                    | C <sub>16</sub> H <sub>12</sub> O <sub>7</sub>  | 19.215 | [M-H] <sup>-</sup>   | 316.0575 | 315.0502 | 315.0510 | 2.5  | 300, 271           | Dmu                             |
| 33                                  | Apigenin 7-O-glucuronide                        | C <sub>21</sub> H <sub>18</sub> O <sub>11</sub> | 20.616 | **[M+H] <sup>+</sup> | 446.0826 | 445.0753 | 445.0755 | 0.5  | 271, 253           | *Cac, Dmc, Emc, Aac, Aau, Amu   |
| 34                                  | Apigenin 7-O-(6''-malonyl-apiosyl-glucoside)    | C <sub>29</sub> H <sub>30</sub> O <sub>17</sub> | 20.668 | [M-H] <sup>-</sup>   | 650.1509 | 649.1436 | 649.1445 | 1.4  | 605                | *Dmc, Aac                       |
| 35                                  | Apigenin 6-C-glucoside                          | C <sub>21</sub> H <sub>20</sub> O <sub>10</sub> | 21.777 | [M-H] <sup>-</sup>   | 432.1045 | 431.0972 | 431.0980 | 1.9  | 413, 341, 311      | *Dethc, Eec                     |
| 36                                  | Apigenin 7-O-apiosylglucoside                   | C <sub>26</sub> H <sub>28</sub> O <sub>14</sub> | 22.663 | [M-H] <sup>-</sup>   | 564.1524 | 563.1451 | 563.1459 | 1.4  | 296                | Eec                             |
| 37                                  | 3-Methoxysinensetin                             | C <sub>21</sub> H <sub>22</sub> O <sub>8</sub>  | 30.813 | [M-H] <sup>-</sup>   | 402.1301 | 401.1228 | 401.1234 | 1.5  | 388, 373, 355, 327 | *Dec, Eau                       |
| 38                                  | Apigenin 6,8-di-C-glucoside                     | C <sub>27</sub> H <sub>30</sub> O <sub>15</sub> | 32.223 | [M-H] <sup>-</sup>   | 594.1592 | 593.1519 | 593.1509 | -1.7 | 503, 473           | *Bac, Aec, Bec, Bethc           |
| <b>Flavanones</b>                   |                                                 |                                                 |        |                      |          |          |          |      |                    |                                 |
| 39                                  | Chrysoeriol 7-O-glucoside                       | C <sub>22</sub> H <sub>22</sub> O <sub>12</sub> | 16.771 | [M-H] <sup>-</sup>   | 478.1134 | 477.1061 | 477.1055 | -1.7 | 445, 427, 409, 381 | *Emc, Dac, Dmc, *Eau, Emu       |
| 40                                  | Naringin 4'-O-glucoside                         | C <sub>33</sub> H <sub>42</sub> O <sub>19</sub> | 30.498 | [M-H] <sup>-</sup>   | 742.2314 | 741.2241 | 741.2258 | 2.3  | 433, 271           | Bec                             |
| 41                                  | Xanthohumol                                     | C <sub>21</sub> H <sub>22</sub> O <sub>5</sub>  | 31.272 | [M-H] <sup>-</sup>   | 354.1486 | 353.1413 | 353.1425 | 3.4  | 338, 309           | Aethc                           |
| <b>Flavonols</b>                    |                                                 |                                                 |        |                      |          |          |          |      |                    |                                 |
| 42                                  | Kaempferol 3-O-glucosyl-rhamnosyl-galactoside   | C <sub>33</sub> H <sub>40</sub> O <sub>20</sub> | 4.719  | [M-H] <sup>-</sup>   | 756.2135 | 755.2062 | 755.2075 | 1.7  | 285                | *Cmc, Ceu                       |

|                         |                                               |                                                   |        |                      |          |          |          |      |                    |                                                     |
|-------------------------|-----------------------------------------------|---------------------------------------------------|--------|----------------------|----------|----------|----------|------|--------------------|-----------------------------------------------------|
| 43                      | Kaempferol 3,7- <i>O</i> -diglucoside         | C <sub>27</sub> H <sub>30</sub> O <sub>16</sub>   | 16.377 | [M-H] <sup>-</sup>   | 610.1542 | 609.1469 | 609.1474 | 0.8  | 447, 285           | Amc                                                 |
| 44                      | Isorhamnetin 3- <i>O</i> -glucuronide         | C <sub>22</sub> H <sub>20</sub> O <sub>13</sub>   | 16.474 | [M-H] <sup>-</sup>   | 492.0928 | 491.0855 | 491.0872 | 3.5  | 315, 300, 272, 255 | *Dac, Dmc                                           |
| 45                      | Myricetin 3- <i>O</i> -galactoside            | C <sub>21</sub> H <sub>20</sub> O <sub>13</sub>   | 16.921 | **[M-H] <sup>-</sup> | 480.0911 | 479.0838 | 479.0848 | 2.1  | 317                | *Emc, Bac, Bethc, Dmc, Eeu, Deu, Beu, Bau           |
| 46                      | Myricetin 3- <i>O</i> -rhamnoside             | C <sub>21</sub> H <sub>20</sub> O <sub>12</sub>   | 17.258 | [M-H] <sup>-</sup>   | 464.0946 | 463.0873 | 463.0867 | -1.3 | 317                | *Dmc, Bac, Bec, Eec, Emc                            |
| 47                      | Quercetin 3- <i>O</i> -arabinoside            | C <sub>20</sub> H <sub>18</sub> O <sub>11</sub>   | 18.213 | [M-H] <sup>-</sup>   | 434.0837 | 433.0764 | 433.0772 | 1.9  | 301                | *Dac, Dmc, Eeu, Dmu                                 |
| 48                      | Myricetin 3- <i>O</i> -arabinoside            | C <sub>20</sub> H <sub>18</sub> O <sub>12</sub>   | 18.956 | [M-H] <sup>-</sup>   | 450.0756 | 449.0683 | 449.0699 | 3.6  | 317                | *Dmc, Emu, Cau                                      |
| 49                      | 6-Hydroxyluteolin 7-rhamnoside                | C <sub>21</sub> H <sub>20</sub> O <sub>11</sub>   | 19.191 | [M-H] <sup>-</sup>   | 448.1003 | 447.0930 | 447.0933 | 0.7  | 301                | *Emc, Cac, Dac, Dethc, Eec, Emc, Eeu, Eau           |
| 50                      | Quercetin 3- <i>O</i> -(6"-malonyl-glucoside) | C <sub>24</sub> H <sub>22</sub> O <sub>15</sub>   | 23.143 | [M-H] <sup>-</sup>   | 550.0977 | 549.0904 | 549.0886 | -3.3 | 303                | Bac                                                 |
| 51                      | Quercetin 3- <i>O</i> -glucosyl-xyloside      | C <sub>26</sub> H <sub>28</sub> O <sub>16</sub>   | 25.144 | [M-H] <sup>-</sup>   | 596.1402 | 595.1329 | 595.1313 | -2.7 | 265, 138, 116      | Bac                                                 |
| 52                      | Quercetin 3'- <i>O</i> -glucuronide           | C <sub>21</sub> H <sub>18</sub> O <sub>13</sub>   | 30.321 | [M-H] <sup>-</sup>   | 478.0733 | 477.0660 | 477.0657 | -0.6 | 301                | *Bec, Bac, Bmu, Beu, Bethu, Bau                     |
| 53                      | Quercetin 3'-sulfate                          | C <sub>15</sub> H <sub>10</sub> O <sub>10</sub> S | 32.872 | [M-H] <sup>-</sup>   | 382.0021 | 380.9948 | 380.9951 | 0.8  | 301                | *Bmc, Aec, Bethc, Dec, Eac, Ceu, Cau, Beu, Bau, Aau |
| 54                      | 3-Methoxynobiletin                            | C <sub>22</sub> H <sub>24</sub> O <sub>9</sub>    | 34.064 | [M+H] <sup>+</sup>   | 432.1461 | 433.1534 | 433.1534 | 0.1  | 403, 385, 373, 345 | *Aethu                                              |
| <b>Dihydrochalcones</b> |                                               |                                                   |        |                      |          |          |          |      |                    |                                                     |
| 55                      | 3-Hydroxyphloretin 2'- <i>O</i> -glucoside    | C <sub>21</sub> H <sub>24</sub> O <sub>11</sub>   | 4.663  | [M-H] <sup>-</sup>   | 452.1348 | 451.1275 | 451.1277 | 0.4  | 289, 273           | *Aac, Aec, Bec, Cac, Eec, Bau                       |
| <b>Dihydroflavonols</b> |                                               |                                                   |        |                      |          |          |          |      |                    |                                                     |
| 56                      | Dihydroquercetin                              | C <sub>15</sub> H <sub>12</sub> O <sub>7</sub>    | 15.971 | [M-H] <sup>-</sup>   | 304.0591 | 303.0518 | 303.0518 | 0.1  | 285, 275, 151      | *Emu                                                |
| 57                      | Dihydroquercetin 3- <i>O</i> -rhamnoside      | C <sub>21</sub> H <sub>22</sub> O <sub>11</sub>   | 19.734 | [M-H] <sup>-</sup>   | 450.1147 | 449.1074 | 449.1077 | 0.7  | 303                | *Eec, Dethc, Dmc, Emc                               |
| 58                      | Dihydromyricetin 3- <i>O</i> -rhamnoside      | C <sub>21</sub> H <sub>22</sub> O <sub>12</sub>   | 23.443 | [M-H] <sup>-</sup>   | 466.1111 | 465.1038 | 465.1047 | 1.9  | 301                | *Emc, Dac, Dethc, Eec, Eau, Deu                     |
| <b>Anthocyanins</b>     |                                               |                                                   |        |                      |          |          |          |      |                    |                                                     |
| 59                      | Genistein 4',7- <i>O</i> -diglucuronide       | C <sub>27</sub> H <sub>26</sub> O <sub>17</sub>   | 23.862 | **[M-H] <sup>-</sup> | 622.1174 | 621.1101 | 621.1122 | 3.4  | 269                | *Aac, Bec, Dethc, Emu, Eeu, Dau, Cau, *Bau, Aau     |
| 60                      | Delphinidin 3- <i>O</i> -glucoside            | C <sub>21</sub> H <sub>21</sub> O <sub>12</sub>   | 26.489 | [M-H] <sup>-</sup>   | 465.1016 | 464.0943 | 464.0940 | -0.7 | 303                | Bac                                                 |
| 61                      | Pelargonidin                                  | C <sub>15</sub> H <sub>11</sub> O <sub>5</sub>    | 32.266 | [M-H] <sup>-</sup>   | 271.0618 | 270.0545 | 270.0557 | 4.4  | 243, 197, 169, 141 | Eac                                                 |

|                             |                                             |                                                 |        |                      |          |          |          |      |               |                                                        |
|-----------------------------|---------------------------------------------|-------------------------------------------------|--------|----------------------|----------|----------|----------|------|---------------|--------------------------------------------------------|
| 62                          | Peonidin 3-O-diglucoside-5-O-glucoside      | C <sub>34</sub> H <sub>43</sub> O <sub>21</sub> | 33.383 | [M-H] <sup>-</sup>   | 787.2331 | 786.2258 | 786.2246 | -1.5 | 625, 478, 317 | *Cethc, Dec                                            |
| <b>Isoflavonoids</b>        |                                             |                                                 |        |                      |          |          |          |      |               |                                                        |
| 63                          | 6''-O-Acetylaidzin                          | C <sub>23</sub> H <sub>22</sub> O <sub>10</sub> | 4.703  | [M-H] <sup>-</sup>   | 458.1218 | 457.1145 | 457.1139 | -1.3 | 221           | Bmc                                                    |
| 64                          | 5,6,7,3',4'-Pentahydroxyisoflavone          | C <sub>15</sub> H <sub>10</sub> O <sub>7</sub>  | 5.266  | [M-H] <sup>-</sup>   | 302.0439 | 301.0366 | 301.0376 | 3.3  | 285, 257      | Amc                                                    |
| 65                          | 6''-O-Acetylglycitin                        | C <sub>24</sub> H <sub>24</sub> O <sub>11</sub> | 5.896  | [M+H] <sup>+</sup>   | 488.1333 | 489.1406 | 489.1398 | -1.6 | 285, 270      | *Amu                                                   |
| 66                          | 2'-Hydroxyformononetin                      | C <sub>16</sub> H <sub>12</sub> O <sub>5</sub>  | 5.934  | **[M-H] <sup>-</sup> | 284.0687 | 283.0614 | 283.0619 | 1.8  | 270, 229      | *Dmc, Cac, Emc, Emu, Eeu, Dmu                          |
| 67                          | 2',7-Dihydroxy-4',5'-dimethoxyisoflavone    | C <sub>17</sub> H <sub>14</sub> O <sub>6</sub>  | 6.882  | [M-H] <sup>-</sup>   | 314.0767 | 313.0694 | 313.0698 | 1.3  | 300, 282      | *Eac, Eec                                              |
| 68                          | 6''-O-Malonylgenistin                       | C <sub>24</sub> H <sub>22</sub> O <sub>13</sub> | 14.363 | **[M+H] <sup>+</sup> | 518.1069 | 517.0996 | 517.0997 | 0.2  | 271           | Eac                                                    |
| 69                          | 2-Dehydro-O-desmethylangolensin             | C <sub>15</sub> H <sub>12</sub> O <sub>4</sub>  | 16.548 | [M-H] <sup>-</sup>   | 256.0746 | 255.0673 | 255.0667 | -2.4 | 135, 119      | *Emc, Bmc                                              |
| 70                          | Sativanone                                  | C <sub>17</sub> H <sub>16</sub> O <sub>5</sub>  | 16.563 | **[M-H] <sup>-</sup> | 300.0994 | 299.0921 | 299.0923 | 0.7  | 284, 269, 225 | *Aec, Aac, Amc, Bec, Aec, Amc, Cac, Emc, Deu, Emu, Eau |
| 71                          | Violanone                                   | C <sub>17</sub> H <sub>16</sub> O <sub>6</sub>  | 16.651 | [M-H] <sup>-</sup>   | 316.0933 | 315.086  | 315.0868 | 2.5  | 300, 285, 135 | *Eeu                                                   |
| 72                          | 6''-O-Malonyldaidzin                        | C <sub>24</sub> H <sub>22</sub> O <sub>12</sub> | 16.73  | [M-H] <sup>-</sup>   | 502.1117 | 501.1044 | 501.1036 | -1.6 | 255           | *Dac, Cac, Eac, Emc, Bau                               |
| 73                          | 6''-O-Malonylglycitin                       | C <sub>25</sub> H <sub>24</sub> O <sub>13</sub> | 18.919 | [M-H] <sup>-</sup>   | 532.1215 | 531.1142 | 531.1145 | 0.6  | 285, 270, 253 | *Emc, Eec                                              |
| 74                          | Pseudobaptigenin                            | C <sub>16</sub> H <sub>10</sub> O <sub>5</sub>  | 19.16  | **[M-H] <sup>-</sup> | 282.0506 | 281.0433 | 281.0431 | -0.7 | 263, 237      | *Dau, Aau                                              |
| 75                          | Dalbergin                                   | C <sub>16</sub> H <sub>12</sub> O <sub>4</sub>  | 21.505 | [M-H] <sup>-</sup>   | 268.0717 | 267.0644 | 267.0656 | 4.5  | 252, 224, 180 | *Deu, Ceu                                              |
| 76                          | Formononetin 7-O-glucuronide                | C <sub>22</sub> H <sub>20</sub> O <sub>10</sub> | 21.977 | [M-H] <sup>-</sup>   | 444.1048 | 443.0975 | 443.0972 | -0.7 | 267, 252      | *Cac, Eac                                              |
| <b>Other polyphenols</b>    |                                             |                                                 |        |                      |          |          |          |      |               |                                                        |
| <b>Hydroxycoumarins</b>     |                                             |                                                 |        |                      |          |          |          |      |               |                                                        |
| 77                          | Esculetin                                   | C <sub>9</sub> H <sub>6</sub> O <sub>4</sub>    | 24.158 | [M-H] <sup>-</sup>   | 178.0280 | 177.0207 | 177.0207 | 0.1  | 149, 133, 89  | *Bau, Bec                                              |
| 78                          | Scopoletin                                  | C <sub>10</sub> H <sub>8</sub> O <sub>4</sub>   | 30.978 | [M-H] <sup>-</sup>   | 192.0406 | 191.0333 | 191.0336 | 1.6  | 176           | *Dmc, Bec, Bmc, Cac, Eec, Emc, Eeu, Eau, Bmu, Beu, Bau |
| <b>Hydroxybenzaldehydes</b> |                                             |                                                 |        |                      |          |          |          |      |               |                                                        |
| 79                          | <i>p</i> -Anisaldehyde                      | C <sub>8</sub> H <sub>8</sub> O <sub>2</sub>    | 30.932 | [M-H] <sup>-</sup>   | 136.0516 | 135.0443 | 135.0442 | -0.7 | 122, 109      | *Bethc, Eac, Eec, Eethc, Emc                           |
| 80                          | 3-Hydroxy-3-(3-hydroxyphenyl)propionic acid | C <sub>9</sub> H <sub>10</sub> O <sub>4</sub>   | 32.498 | [M-H] <sup>-</sup>   | 182.0582 | 181.0509 | 181.0507 | -1.1 | 163, 135, 119 | Eac                                                    |
| 81                          | 2-Hydroxy-2-phenylacetic acid               | C <sub>8</sub> H <sub>8</sub> O <sub>3</sub>    | 33.492 | [M-H] <sup>-</sup>   | 152.0465 | 151.0392 | 151.0395 | 2.0  | 136, 92       | *Eethc, Dmc, Eac, Aeu, Aau                             |
| <b>Hydroxybenzoketones</b>  |                                             |                                                 |        |                      |          |          |          |      |               |                                                        |
| 82                          | 2-Hydroxy-4-methoxyacetophenone 5-sulfate   | C <sub>9</sub> H <sub>10</sub> O <sub>7</sub> S | 24.081 | **[M-H] <sup>-</sup> | 262.0155 | 261.0082 | 261.0081 | -0.4 | 181, 97       | *Aeu, Aau                                              |

| Alkylmethoxyphenols |                                   |                                                 |        |                      |          |          |          |      |                    |                                                                                |
|---------------------|-----------------------------------|-------------------------------------------------|--------|----------------------|----------|----------|----------|------|--------------------|--------------------------------------------------------------------------------|
| 83                  | Equol                             | C <sub>15</sub> H <sub>14</sub> O <sub>3</sub>  | 16.947 | [M+H] <sup>+</sup>   | 242.0952 | 243.1025 | 243.1027 | 0.8  | 255, 211, 197      | *Amc, Aac, Aec, Eac, Eethc, Emu, Eau, Dau                                      |
| Phenolic terpenes   |                                   |                                                 |        |                      |          |          |          |      |                    |                                                                                |
| 84                  | Carnosic acid                     | C <sub>20</sub> H <sub>28</sub> O <sub>4</sub>  | 32.446 | [M-H] <sup>-</sup>   | 332.1984 | 331.1911 | 331.1912 | 0.3  | 287, 269           | *Emc, Emu, Eau, Dmu, Deu, Dau, Ceu, Cethu, Cau, Bmu, Beu, Bethu, Bau, Amu, Aau |
| Tyrosols            |                                   |                                                 |        |                      |          |          |          |      |                    |                                                                                |
| 85                  | 3,4-DHPEA-AC                      | C <sub>10</sub> H <sub>12</sub> O <sub>4</sub>  | 24.521 | [M-H] <sup>-</sup>   | 196.0736 | 195.0663 | 195.0662 | -0.5 | 135                | *Amu, Cac                                                                      |
| Other polyphenols   |                                   |                                                 |        |                      |          |          |          |      |                    |                                                                                |
| 86                  | Arbutin                           | C <sub>12</sub> H <sub>16</sub> O <sub>7</sub>  | 19.621 | [M-H] <sup>-</sup>   | 272.0901 | 271.0828 | 271.0827 | -0.4 | 109                | *Ceu, Cau                                                                      |
| 87                  | Lithospermic acid                 | C <sub>27</sub> H <sub>22</sub> O <sub>12</sub> | 22.962 | **[M-H] <sup>-</sup> | 538.1142 | 537.1069 | 537.1075 | 1.1  |                    | *Dmc, Cec                                                                      |
| Lignans             |                                   |                                                 |        |                      |          |          |          |      |                    |                                                                                |
| 88                  | Arctigenin                        | C <sub>21</sub> H <sub>24</sub> O <sub>6</sub>  | 4.853  | [M-H] <sup>-</sup>   | 372.1544 | 371.1471 | 371.1467 | -1.1 | 493, 339, 295      | *Aethc, Dmu, Dau, Cau, Aeu, Aau                                                |
| 89                  | Sesamin                           | C <sub>20</sub> H <sub>18</sub> O <sub>6</sub>  | 24.500 | **[M-H] <sup>-</sup> | 354.1138 | 353.1065 | 353.1068 | 0.9  | 338, 163           | *Eec, Deu, Aeu                                                                 |
| 90                  | 7-Hydroxymatairesinol             | C <sub>20</sub> H <sub>22</sub> O <sub>7</sub>  | 31.735 | [M-H] <sup>-</sup>   | 374.1335 | 373.1262 | 373.1265 | 0.8  | 343, 313, 298, 285 | Aac                                                                            |
| 91                  | Secoisolariciresinol-sesquilignan | C <sub>30</sub> H <sub>38</sub> O <sub>10</sub> | 31.907 | [M-H] <sup>-</sup>   | 558.2434 | 557.2361 | 557.2387 | 4.7  | 539, 521, 509, 361 | *Aec, Amu                                                                      |

\*Compound was detected in more than one seaweed samples, data presented in this table are from asterisk sample. \*\*Compounds were detected in both negative [M-H]<sup>-</sup> and positive [M+H]<sup>+</sup> mode of ionization while only single mode data was presented. Seaweed samples were mentioned in abbreviations.

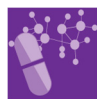**Table S6.** Characterization of bound phenolic compounds in different seaweed samples with different extraction methods by LC-ESI-QTOF-MS/MS

| No.                          | Proposed compounds                           | Molecular<br>Formula                             | RT<br>(min) | Ionization<br>(ESI <sup>+</sup> /ESI <sup>-</sup> ) | Molecular<br>Weight | Theoretical<br>( <i>m/z</i> ) | Observed<br>( <i>m/z</i> ) | Error<br>(ppm) | MS <sup>2</sup> Product<br>ions | Seaweed                                                                       |
|------------------------------|----------------------------------------------|--------------------------------------------------|-------------|-----------------------------------------------------|---------------------|-------------------------------|----------------------------|----------------|---------------------------------|-------------------------------------------------------------------------------|
| <b>Phenolic acid</b>         |                                              |                                                  |             |                                                     |                     |                               |                            |                |                                 |                                                                               |
| <b>Hydroxybenzoic acids</b>  |                                              |                                                  |             |                                                     |                     |                               |                            |                |                                 |                                                                               |
| 1                            | Protocatechuic acid 4- <i>O</i> -glucoside   | C <sub>13</sub> H <sub>16</sub> O <sub>9</sub>   | 3.062       | [M-H] <sup>-</sup>                                  | 316.0818            | 315.0745                      | 315.0751                   | 1.9            | 153                             | *Cethbc, Cebc, Debc, Dmbc, Dmbu, Embu                                         |
| 2                            | Gallic acid 4- <i>O</i> -glucoside           | C <sub>13</sub> H <sub>16</sub> O <sub>10</sub>  | 7.404       | [M-H] <sup>-</sup>                                  | 332.0737            | 331.0664                      | 331.0670                   | 1.8            | 169, 125                        | *Cabu, Cebu, Dmbu                                                             |
| 3                            | 4-Hydroxybenzoic acid 4- <i>O</i> -glucoside | C <sub>13</sub> H <sub>16</sub> O <sub>8</sub>   | 7.687       | [M-H] <sup>-</sup>                                  | 300.0839            | 299.0766                      | 299.0773                   | 2.3            | 255, 137                        | Dabc                                                                          |
| 4                            | 4-Hydroxybenzaldehyde                        | C <sub>7</sub> H <sub>6</sub> O <sub>2</sub>     | 25.146      | [M-H] <sup>-</sup>                                  | 122.0366            | 121.0293                      | 121.0294                   | 0.8            | 77                              | *Bethbc, Cmbc, Dabc, Dabu, Dmbc                                               |
| 5                            | 2,3-Dihydroxybenzoic acid                    | C <sub>7</sub> H <sub>6</sub> O <sub>4</sub>     | 25.802      | [M-H] <sup>-</sup>                                  | 154.0262            | 153.0189                      | 153.0190                   | 0.7            | 109                             | *Bethbc, Eethbu                                                               |
| 6                            | Gallic acid                                  | C <sub>7</sub> H <sub>6</sub> O <sub>5</sub>     | 31.309      | [M-H] <sup>-</sup>                                  | 170.0225            | 169.0152                      | 169.0154                   | 1.2            | 125                             | *Aabu, Aabc, Aebu, Ambu, Babu, Bebu, Bethbu, Bmbu, Debc, Dethbu, Eabu, Eethbu |
| 7                            | 2-Hydroxybenzoic acid                        | C <sub>7</sub> H <sub>6</sub> O <sub>3</sub>     | 32.019      | [M-H] <sup>-</sup>                                  | 138.0310            | 137.0237                      | 137.0238                   | 0.7            | 93                              | *Bethbc, Dabu, Dmbu                                                           |
| <b>Hydroxycinnamic acids</b> |                                              |                                                  |             |                                                     |                     |                               |                            |                |                                 |                                                                               |
| 8                            | 1-Sinapoyl-2,2'-diferuloylgentiobiose        | C <sub>43</sub> H <sub>48</sub> O <sub>21</sub>  | 3.119       | [M-H] <sup>-</sup>                                  | 900.2677            | 899.2604                      | 899.2574                   | -3.3           | 613, 201                        | *Aebc, Debc                                                                   |
| 9                            | <i>m</i> -Coumaric acid                      | C <sub>9</sub> H <sub>8</sub> O <sub>3</sub>     | 5.228       | [M-H] <sup>-</sup>                                  | 164.0487            | 163.0414                      | 163.0412                   | -1.2           | 119                             | *Dabu, Cmbu, Debu, Dmbu, Eabu                                                 |
| 10                           | Isoferulic acid 3-sulfate                    | C <sub>10</sub> H <sub>10</sub> O <sub>7</sub> S | 5.608       | [M-H] <sup>-</sup>                                  | 274.0129            | 273.0056                      | 273.0054                   | -0.7           | 193, 178                        | *Aabu, Aethbu, Ambu, Bmbu, Cabu, Dabu                                         |
| 11                           | Caffeic acid 3- <i>O</i> -glucuronide        | C <sub>15</sub> H <sub>16</sub> O <sub>10</sub>  | 6.388       | **[M-H] <sup>-</sup>                                | 356.0743            | 355.0670                      | 355.0673                   | 0.8            | 179                             | *Ambc, Dethbc, Cebu, Ambu, Embu, Cethbu                                       |
| 12                           | Cinnamic acid                                | C <sub>9</sub> H <sub>8</sub> O <sub>2</sub>     | 7.246       | **[M-H] <sup>-</sup>                                | 148.0537            | 147.0464                      | 147.0465                   | 0.7            | 103                             | *Ambc, Cmbc, Cebu, Aethbu, Bmbu, Cabu, Dmbu, Dabu, Eabu                       |

|                              |                                                |                                                 |        |                      |          |          |          |      |                    |                                                                                   |
|------------------------------|------------------------------------------------|-------------------------------------------------|--------|----------------------|----------|----------|----------|------|--------------------|-----------------------------------------------------------------------------------|
| 13                           | Ferulic acid 4- <i>O</i> -glucoside            | C <sub>16</sub> H <sub>20</sub> O <sub>9</sub>  | 13.750 | [M-H] <sup>-</sup>   | 356.1106 | 355.1033 | 355.1025 | -2.3 | 193, 178, 149, 134 | *Aabu, Babu                                                                       |
| 14                           | Chlorogenic acid                               | C <sub>16</sub> H <sub>18</sub> O <sub>9</sub>  | 13.985 | [M-H] <sup>-</sup>   | 354.0929 | 353.0856 | 353.0855 | -0.3 | 253, 190, 144      | *Cabac, Dabu, Babu, Cabu, Cebu, Eabu, Eabc                                        |
| 15                           | 1-Sinapoyl-2-feruloylgentiobiose               | C <sub>33</sub> H <sub>40</sub> O <sub>18</sub> | 14.898 | [M-H] <sup>-</sup>   | 724.2205 | 723.2132 | 723.2136 | 0.6  | 529, 499           | *Bmbu, Cabu, Cethbu, Cmbu, Dmbu, Eebu                                             |
| 16                           | Ferulic acid 4- <i>O</i> -glucuronide          | C <sub>16</sub> H <sub>18</sub> O <sub>10</sub> | 14.994 | [M-H] <sup>-</sup>   | 370.0886 | 369.0813 | 369.0811 | -0.5 | 193                | **Ceabc, Dethbc, Dabu, Debu, Embu                                                 |
| 17                           | <i>p</i> -Coumaroyl tartaric acid              | C <sub>13</sub> H <sub>12</sub> O <sub>8</sub>  | 16.214 | [M-H] <sup>-</sup>   | 296.0555 | 295.0482 | 295.0486 | 1.4  | 115                | *Dmbc, Debu, Dmbu, Embu                                                           |
| 18                           | <i>p</i> -Coumaroyl malic acid                 | C <sub>13</sub> H <sub>12</sub> O <sub>7</sub>  | 16.596 | **[M-H] <sup>-</sup> | 280.0596 | 279.0523 | 279.0512 | -3.9 | 163, 119           | *Aeabc, Ambc, Debc, Dmbu, Cabu, Cebu, Cethbu, Dabu, Dmbu                          |
| 19                           | 1,5-Dicaffeoylquinic acid                      | C <sub>25</sub> H <sub>24</sub> O <sub>12</sub> | 17.017 | [M-H] <sup>-</sup>   | 516.1233 | 515.1160 | 515.1172 | 2.3  | 353, 335, 191, 179 | *Dabu, Eabu                                                                       |
| 20                           | Hydroxycaffeic acid                            | C <sub>9</sub> H <sub>8</sub> O <sub>5</sub>    | 17.250 | [M-H] <sup>-</sup>   | 196.0376 | 195.0303 | 195.0304 | 0.5  | 151                | *Aabc, Bethbc, Dabc, Dethbc, Cebu                                                 |
| 21                           | <i>p</i> -Coumaric acid 4- <i>O</i> -glucoside | C <sub>15</sub> H <sub>18</sub> O <sub>8</sub>  | 17.367 | [M-H] <sup>-</sup>   | 326.0970 | 325.0897 | 325.0891 | -1.8 | 163                | *Bebc, Eabu, Dabu                                                                 |
| 22                           | Caffeoyl glucose                               | C <sub>15</sub> H <sub>18</sub> O <sub>9</sub>  | 18.549 | [M-H] <sup>-</sup>   | 342.0951 | 341.0878 | 341.0890 | 3.5  | 179, 161           | *Dmbu, Dabu, Eabu, Eeabc                                                          |
| 23                           | Rosmarinic acid                                | C <sub>18</sub> H <sub>16</sub> O <sub>8</sub>  | 18.986 | [M-H] <sup>-</sup>   | 360.0823 | 359.0750 | 359.0753 | 0.8  | 179                | *Dmbc, Eabc, Dmbu                                                                 |
| 24                           | 3- <i>p</i> -Coumaroylquinic acid              | C <sub>16</sub> H <sub>18</sub> O <sub>8</sub>  | 19.117 | [M-H] <sup>-</sup>   | 338.0998 | 337.0925 | 337.0926 | 0.3  | 265, 173, 162      | *Dabc, Dabu, Cabu, Eabu, Eebu                                                     |
| 25                           | Cinnamoyl glucose                              | C <sub>15</sub> H <sub>18</sub> O <sub>7</sub>  | 20.687 | [M-H] <sup>-</sup>   | 310.1035 | 309.0962 | 309.0955 | -2.3 | 147, 131, 103      | *Dabc, Debu, Eabc                                                                 |
| 26                           | 5-5'-Dehydrodiferulic acid                     | C <sub>20</sub> H <sub>18</sub> O <sub>8</sub>  | 21.657 | **[M-H] <sup>+</sup> | 386.0985 | 385.0912 | 385.0913 | 0.3  | 369                | *Eabu, Embu, Cebu                                                                 |
| Hydroxyphenylacetic acids    |                                                |                                                 |        |                      |          |          |          |      |                    |                                                                                   |
| 27                           | 3,4-Dihydroxyphenylacetic acid                 | C <sub>8</sub> H <sub>8</sub> O <sub>4</sub>    | 15.889 | [M-H] <sup>-</sup>   | 168.0426 | 167.0353 | 167.0354 | 0.6  | 149, 123           | Aabc                                                                              |
| Hydroxyphenylpentanoic acids |                                                |                                                 |        |                      |          |          |          |      |                    |                                                                                   |
| 28                           | Sinapic acid                                   | C <sub>11</sub> H <sub>12</sub> O <sub>5</sub>  | 22.780 | **[M-H] <sup>-</sup> | 224.0674 | 223.0601 | 223.0598 | -1.3 | 205, 163           | *Cabac, Aabc, Ambc, Babc, Bebc, Bmbc, Ceabc, Eabc, Aabu, Cethbu, Dabu, Debu, Dmbu |
| Hydroxyphenylpropanoic acids |                                                |                                                 |        |                      |          |          |          |      |                    |                                                                                   |
| 29                           | Dihydroferulic acid 4- <i>O</i> -glucuronide   | C <sub>16</sub> H <sub>20</sub> O <sub>10</sub> | 3.119  | **[M-H] <sup>-</sup> | 372.1090 | 371.1017 | 371.1019 | 0.5  | 195                | *Aabc, Aeabc, Cabac, Ceabc, Cmbc, Debc, Dmbc, Eabc, Aethbc, Dethbc, Babu,         |



|                   |                                                 |                                                  |        |                      |          |          |          |      |                    |                                                 |
|-------------------|-------------------------------------------------|--------------------------------------------------|--------|----------------------|----------|----------|----------|------|--------------------|-------------------------------------------------|
|                   |                                                 |                                                  |        |                      |          |          |          |      |                    | Bebu, Bmbu, Dabu, Eabu, Embu, Cethbu            |
| 30                | Dihydrocaffeic acid 3-O-glucuronide             | C <sub>15</sub> H <sub>18</sub> O <sub>10</sub>  | 7.535  | **[M-H] <sup>-</sup> | 358.0913 | 357.0840 | 357.0837 | -0.8 | 181                | *Bebu, Bmbu, Debu, Eabu, Eebu, Embu, Aabu, Eebu |
| 31                | Dihydroferulic acid 4-sulfate                   | C <sub>10</sub> H <sub>12</sub> O <sub>7</sub> S | 16.763 | [M-H] <sup>-</sup>   | 276.0290 | 275.0217 | 275.0212 | -1.8 | 195, 151, 177      | Eebu                                            |
| <b>Flavonoids</b> |                                                 |                                                  |        |                      |          |          |          |      |                    |                                                 |
| <b>Flavanols</b>  |                                                 |                                                  |        |                      |          |          |          |      |                    |                                                 |
| 32                | Theaflavin                                      | C <sub>29</sub> H <sub>24</sub> O <sub>12</sub>  | 3.082  | [M-H] <sup>-</sup>   | 564.1254 | 563.1181 | 563.1198 | 3.0  | 545                | *Embc, Bebu, Dabu                               |
| 33                | 4''-O-Methylepigallocatechin 3-O-gallate        | C <sub>23</sub> H <sub>20</sub> O <sub>11</sub>  | 7.467  | **[M-H] <sup>-</sup> | 472.1028 | 471.0955 | 471.0972 | 3.6  | 169, 319           | Debc                                            |
| 34                | (+)-Galocatechin 3-O-gallate                    | C <sub>22</sub> H <sub>18</sub> O <sub>11</sub>  | 7.625  | [M-H] <sup>-</sup>   | 458.0830 | 457.0757 | 457.0755 | -0.4 | 305, 169           | *Babc, Bebc, Cebc, Debc, Cebu, Debu             |
| 35                | (+)-Catechin                                    | C <sub>15</sub> H <sub>14</sub> O <sub>6</sub>   | 14.525 | [M-H] <sup>-</sup>   | 290.0767 | 289.0694 | 289.0697 | 1.0  | 245, 205, 179      | Dabu                                            |
| 36                | Prodelphinidin dimer B3                         | C <sub>30</sub> H <sub>26</sub> O <sub>14</sub>  | 16.094 | [M+H] <sup>+</sup>   | 610.1318 | 611.1391 | 611.1366 | -4.1 | 469, 311, 291      | Aebc                                            |
| 37                | 3'-O-Methylcatechin                             | C <sub>16</sub> H <sub>16</sub> O <sub>6</sub>   | 17.951 | **[M-H] <sup>-</sup> | 304.0959 | 303.0886 | 303.0894 | 2.6  | 271, 163           | Babu                                            |
| 38                | Procyanidin dimer B1                            | C <sub>30</sub> H <sub>26</sub> O <sub>12</sub>  | 18.209 | **[M-H] <sup>-</sup> | 578.1444 | 577.1371 | 577.1378 | 1.2  | 451                | *Cabbc, Aebc, Dethbc, Babu                      |
| 39                | (+)-Catechin 3-O-gallate                        | C <sub>22</sub> H <sub>18</sub> O <sub>10</sub>  | 20.261 | [M-H] <sup>-</sup>   | 442.0879 | 441.0806 | 441.0811 | 1.1  | 289, 169, 125      | Embu                                            |
| 40                | 4'-O-Methyl(-)-epigallocatechin 7-O-glucuronide | C <sub>22</sub> H <sub>24</sub> O <sub>13</sub>  | 20.795 | [M-H] <sup>-</sup>   | 496.1187 | 495.1114 | 495.1117 | 0.6  | 451, 313           | Embc                                            |
| 41                | (-)-Epigallocatechin                            | C <sub>15</sub> H <sub>14</sub> O <sub>7</sub>   | 21.240 | [M-H] <sup>-</sup>   | 306.0749 | 305.0676 | 305.0674 | -0.7 | 261, 219           | **Aabc, Eabc, Debu, Eabu, Embu                  |
| <b>Flavones</b>   |                                                 |                                                  |        |                      |          |          |          |      |                    |                                                 |
| 42                | Genistein 4',7-O-diglucuronide                  | C <sub>27</sub> H <sub>26</sub> O <sub>17</sub>  | 7.415  | [M-H] <sup>-</sup>   | 622.1149 | 621.1076 | 621.1088 | 1.9  | 269                | Debc                                            |
| 43                | 3-Methoxysinensetin                             | C <sub>21</sub> H <sub>18</sub> O <sub>11</sub>  | 16.159 | [M-H] <sup>-</sup>   | 446.0883 | 445.0810 | 445.0802 | -1.8 | 271, 253           | Dabc                                            |
| 44                | Apigenin 6-C-glucoside                          | C <sub>21</sub> H <sub>20</sub> O <sub>10</sub>  | 16.981 | [M-H] <sup>-</sup>   | 432.1077 | 431.1004 | 431.1015 | 2.6  | 413, 341, 311      | *Dabu, Dmbu                                     |
| <b>Flavanones</b> |                                                 |                                                  |        |                      |          |          |          |      |                    |                                                 |
| 45                | Hesperetin 3',7-O-diglucuronide                 | C <sub>28</sub> H <sub>30</sub> O <sub>18</sub>  | 4.806  | [M-H] <sup>-</sup>   | 654.1424 | 653.1351 | 653.1356 | 0.8  | 477, 301, 286, 242 | *Embc, Babu, Cmbu, Debu, Eabu                   |
| 46                | Narirutin                                       | C <sub>27</sub> H <sub>32</sub> O <sub>14</sub>  | 5.264  | [M-H] <sup>-</sup>   | 580.1827 | 579.1754 | 579.1756 | 0.3  | 271                | *Cmbu, Cabu, Cebu                               |

|                         |                                  |                                                  |        |                      |          |          |          |      |                       |                                                                           |
|-------------------------|----------------------------------|--------------------------------------------------|--------|----------------------|----------|----------|----------|------|-----------------------|---------------------------------------------------------------------------|
| 47                      | Hesperetin 3'-sulfate            | C <sub>16</sub> H <sub>14</sub> O <sub>9</sub> S | 7.389  | [M-H] <sup>-</sup>   | 382.0354 | 381.0281 | 381.0277 | -1.0 | 301, 286, 257,<br>242 | *Babc, Bebc, Cebc, Dmbc, Embc,<br>Aethbu, Ambu, Babu, Cmbu, Dmbu,<br>Eabu |
| 48                      | Hesperetin 3'-O-glucuronide      | C <sub>22</sub> H <sub>22</sub> O <sub>12</sub>  | 20.774 | [M-H] <sup>-</sup>   | 478.1106 | 477.1033 | 477.1027 | -1.3 | 301, 175, 113,<br>85  | *Dabc, Eabc, Eebc                                                         |
| 49                      | Naringin 4'-O-glucoside          | C <sub>33</sub> H <sub>42</sub> O <sub>19</sub>  | 32.747 | [M-H] <sup>-</sup>   | 742.2295 | 741.2222 | 741.2232 | 1.3  | 433, 271              | Cethbu                                                                    |
| <b>Flavonols</b>        |                                  |                                                  |        |                      |          |          |          |      |                       |                                                                           |
| 50                      | Quercetin 3'-O-glucuronide       | C <sub>21</sub> H <sub>18</sub> O <sub>13</sub>  | 5.185  | [M-H] <sup>-</sup>   | 478.0758 | 477.0685 | 477.0679 | -1.3 | 301                   | Cabu                                                                      |
| 51                      | 6-Hydroxyluteolin 7-rhamnoside   | C <sub>21</sub> H <sub>20</sub> O <sub>11</sub>  | 5.667  | [M-H] <sup>-</sup>   | 448.0964 | 447.0891 | 447.0888 | -0.7 | 301                   | *Cmbc, Eebc                                                               |
| 52                      | Myricetin 3-O-arabinoside        | C <sub>20</sub> H <sub>18</sub> O <sub>12</sub>  | 7.182  | [M-H] <sup>-</sup>   | 450.0821 | 449.0748 | 449.0750 | 0.4  | 317                   | Cebu                                                                      |
| 53                      | Quercetin 3-O-glucosyl-xyloside  | C <sub>26</sub> H <sub>28</sub> O <sub>16</sub>  | 15.852 | [M-H] <sup>-</sup>   | 596.1347 | 595.1274 | 595.1280 | 1.0  | 265, 138, 116         | Eabu                                                                      |
| 54                      | Isorhamnetin 3-O-glucuronide     | C <sub>22</sub> H <sub>20</sub> O <sub>13</sub>  | 15.938 | [M-H] <sup>-</sup>   | 492.0897 | 491.0824 | 491.0821 | -0.6 | 315, 300, 272,<br>255 | Aabu                                                                      |
| 55                      | Quercetin 3-O-arabinoside        | C <sub>20</sub> H <sub>18</sub> O <sub>11</sub>  | 16.516 | [M-H] <sup>-</sup>   | 434.0851 | 433.0778 | 433.0784 | 1.4  | 301                   | Dmbu                                                                      |
| 56                      | Quercetin 3-O-xylosyl-rutinoside | C <sub>32</sub> H <sub>38</sub> O <sub>20</sub>  | 33.752 | [M+H] <sup>+</sup>   | 742.1933 | 743.2006 | 743.2003 | -0.4 | 479, 317              | Debc                                                                      |
| <b>Dihydroflavonols</b> |                                  |                                                  |        |                      |          |          |          |      |                       |                                                                           |
| 57                      | Dihydroquercetin                 | C <sub>15</sub> H <sub>12</sub> O <sub>7</sub>   | 7.469  | [M-H] <sup>-</sup>   | 304.0599 | 303.0526 | 303.0511 | -4.9 | 285, 275, 151         | Dabu                                                                      |
| 58                      | Dihydroquercetin 3-O-rhamnoside  | C <sub>21</sub> H <sub>22</sub> O <sub>11</sub>  | 20.314 | [M-H] <sup>-</sup>   | 450.1166 | 449.1093 | 449.1084 | -2.0 | 303                   | *Eabc, Dabc, Eabc                                                         |
| <b>Anthocyanins</b>     |                                  |                                                  |        |                      |          |          |          |      |                       |                                                                           |
| 59                      | Cyanidin 3,5-O-diglucoside       | C <sub>27</sub> H <sub>31</sub> O <sub>16</sub>  | 32.278 | [M+H] <sup>+</sup>   | 611.1632 | 612.1705 | 612.1711 | 1.0  | 449, 287              | *Aethbc, Bebc, Debc                                                       |
| <b>Isoflavonoids</b>    |                                  |                                                  |        |                      |          |          |          |      |                       |                                                                           |
| 60                      | 2-Dehydro-O-desmethylangolensin  | C <sub>15</sub> H <sub>12</sub> O <sub>4</sub>   | 5.898  | [M-H] <sup>-</sup>   | 256.0751 | 255.0678 | 255.0679 | 0.4  | 135, 119              | *Cmbu, Babu                                                               |
| 61                      | Violanone                        | C <sub>17</sub> H <sub>16</sub> O <sub>6</sub>   | 5.937  | [M-H] <sup>-</sup>   | 316.0932 | 315.0859 | 315.0850 | -2.9 | 300, 285, 135         | **Aebc, Ambc, Cmbu, Embu                                                  |
| 62                      | Sativanone                       | C <sub>17</sub> H <sub>16</sub> O <sub>5</sub>   | 16.691 | [M+H] <sup>+</sup>   | 300.0994 | 301.1067 | 301.1066 | -0.3 | 284, 269, 225         | Ambc                                                                      |
| 63                      | Glycitin                         | C <sub>22</sub> H <sub>22</sub> O <sub>10</sub>  | 30.888 | [M-H] <sup>-</sup>   | 446.1206 | 445.1133 | 445.1124 | -2.0 | 285                   | *Cethbu, Eabu                                                             |
| 64                      | 6''-O-Malonyldaidzin             | C <sub>24</sub> H <sub>22</sub> O <sub>12</sub>  | 33.752 | **[M+H] <sup>+</sup> | 502.1093 | 503.1166 | 503.1178 | 2.4  | 255                   | *Debc, Dabc, Embc                                                         |

| Other polyphenols     |                                 |                                                 |        |                      |          |          |          |      |                    |                                                           |
|-----------------------|---------------------------------|-------------------------------------------------|--------|----------------------|----------|----------|----------|------|--------------------|-----------------------------------------------------------|
| Hydroxycoumarins      |                                 |                                                 |        |                      |          |          |          |      |                    |                                                           |
| 65                    | Scopoletin                      | C <sub>10</sub> H <sub>8</sub> O <sub>4</sub>   | 31.153 | [M-H] <sup>-</sup>   | 192.0407 | 191.0334 | 191.0335 | 0.5  | 176                | *Babc, Aebc, Bebc, Bethbc, Bmbc, Dabc, Debc, Dmbc, Bethbu |
| Hydroxybenzaldehydes  |                                 |                                                 |        |                      |          |          |          |      |                    |                                                           |
| 66                    | 2-Hydroxy-2-phenylacetic acid   | C <sub>8</sub> H <sub>8</sub> O <sub>3</sub>    | 14.463 | [M-H] <sup>-</sup>   | 152.0473 | 151.0400 | 151.0401 | 0.7  | 136, 92            | *Cmbc, Aabc, Cabc, Dabc, Eabc, Cebu                       |
| Hydroxyphenylpropenes |                                 |                                                 |        |                      |          |          |          |      |                    |                                                           |
| Alkylmethoxyphenols   |                                 |                                                 |        |                      |          |          |          |      |                    |                                                           |
| 67                    | Equol                           | C <sub>15</sub> H <sub>14</sub> O <sub>3</sub>  | 18.110 | [M+H] <sup>+</sup>   | 242.0943 | 243.1016 | 243.1014 | -0.8 | 255, 211, 197      | Cabc                                                      |
| Phenolic terpenes     |                                 |                                                 |        |                      |          |          |          |      |                    |                                                           |
| 68                    | Carnosic acid                   | C <sub>20</sub> H <sub>28</sub> O <sub>4</sub>  | 32.549 | **[M-H] <sup>-</sup> | 332.2004 | 331.1931 | 331.1933 | 0.6  | 287, 269           | *Dethbc, Eabc, Dethbu, Cethbu                             |
| Tyrosols              |                                 |                                                 |        |                      |          |          |          |      |                    |                                                           |
| 69                    | Hydroxytyrosol 4-O-glucoside    | C <sub>14</sub> H <sub>20</sub> O <sub>8</sub>  | 16.175 | [M-H] <sup>-</sup>   | 316.1149 | 315.1076 | 315.1076 | 0.1  | 153, 123           | Cmbc                                                      |
| 70                    | 3,4-DHPEA-EDA                   | C <sub>17</sub> H <sub>20</sub> O <sub>6</sub>  | 29.370 | [M-H] <sup>-</sup>   | 320.127  | 319.1197 | 319.1192 | -1.6 | 275, 195           | *Bethbc, Aabu, Bmbu                                       |
| Other polyphenols     |                                 |                                                 |        |                      |          |          |          |      |                    |                                                           |
| 71                    | Salvianolic acid B              | C <sub>36</sub> H <sub>30</sub> O <sub>16</sub> | 16.693 | [M-H] <sup>-</sup>   | 718.1517 | 717.1444 | 717.1421 | -3.2 | 519, 339, 321, 295 | Embc                                                      |
| 72                    | Lithospermic acid               | C <sub>27</sub> H <sub>22</sub> O <sub>12</sub> | 17.324 | **[M-H] <sup>-</sup> | 538.1097 | 537.1024 | 537.1018 | -1.1 | 493, 339, 295      | *Eabc, Cabc, Cethbc                                       |
| 73                    | Salvianolic acid C              | C <sub>26</sub> H <sub>20</sub> O <sub>10</sub> | 21.929 | [M-H] <sup>-</sup>   | 492.1052 | 491.0979 | 491.0989 | 2.0  | 311, 267, 249      | *Debc, Dmbc, Embu                                         |
| Lignans               |                                 |                                                 |        |                      |          |          |          |      |                    |                                                           |
| 74                    | Schisandrol B                   | C <sub>23</sub> H <sub>28</sub> O <sub>7</sub>  | 3.062  | **[M-H] <sup>-</sup> | 416.1824 | 415.1751 | 415.1749 | -0.5 | 224, 193, 165      | Aebu                                                      |
| 75                    | Sesamin                         | C <sub>20</sub> H <sub>18</sub> O <sub>6</sub>  | 13.750 | [M-H] <sup>-</sup>   | 354.1120 | 353.1047 | 353.1037 | -2.8 | 338, 163           | *Aabu, Babu                                               |
| 76                    | Todolactol A                    | C <sub>20</sub> H <sub>24</sub> O <sub>7</sub>  | 16.242 | [M-H] <sup>-</sup>   | 376.1546 | 375.1473 | 375.1469 | -1.1 | 313, 137           | *Debc, Embc, Ambu, Dmbu                                   |
| 77                    | Arctigenin                      | C <sub>21</sub> H <sub>24</sub> O <sub>6</sub>  | 26.476 | [M-H] <sup>-</sup>   | 372.1565 | 371.1492 | 371.1494 | 0.5  | 356, 312, 295      | *Embu, Eebu                                               |
| 78                    | 7-Hydroxymatairesinol           | C <sub>20</sub> H <sub>22</sub> O <sub>7</sub>  | 28.718 | **[M-H] <sup>-</sup> | 374.1379 | 373.1306 | 373.1311 | 1.3  | 343, 313, 298, 285 | *Bethbc, Dabc, Eebc, Aebu, Eebu                           |
| 79                    | Secoisolariciresinol-sesquiglan | C <sub>30</sub> H <sub>38</sub> O <sub>10</sub> | 31.577 | [M-H] <sup>-</sup>   | 558.2471 | 557.2398 | 557.2372 | -4.7 | 539, 521, 509, 361 | Debc                                                      |

|                  |                           |                                                |        |                    |          |          |          |      |                       |                           |
|------------------|---------------------------|------------------------------------------------|--------|--------------------|----------|----------|----------|------|-----------------------|---------------------------|
| 80               | 7-Oxomatairesinol         | C <sub>20</sub> H <sub>20</sub> O <sub>7</sub> | 32.347 | [M+H] <sup>+</sup> | 372.1184 | 373.1257 | 373.1256 | -0.3 | 358, 343, 328,<br>325 | *Babc, Bebc, Bethbc, Cmbc |
| <b>Stilbenes</b> |                           |                                                |        |                    |          |          |          |      |                       |                           |
| 81               | Resveratrol               | C <sub>14</sub> H <sub>12</sub> O <sub>3</sub> | 13.985 | [M-H] <sup>-</sup> | 228.0806 | 227.0733 | 227.0739 | 2.6  | 212, 185, 157,<br>143 | Dabu                      |
| 82               | Resveratrol 5-O-glucoside | C <sub>20</sub> H <sub>22</sub> O <sub>8</sub> | 33.742 | [M-H] <sup>-</sup> | 390.1283 | 389.1210 | 389.1214 | 1.0  | 227                   | *Embc, Debu               |

\*Compound was detected in more than one seaweed samples, data presented in this table are from asterisk sample. \*\*Compounds were detected in both negative [M-H]<sup>-</sup> and positive [M+H]<sup>+</sup> mode of ionization while only single mode data was presented.
